# Supplementary material for: Clonal evolution and clinical implications of genetic abnormalities in blastic transformation of chronic myeloid leukaemia
Source: PubMed Central journal article supplement (PMC8121838; doi:10.1038/s41467-021-23097-w), 2021-05-14
Supplement: 41467_2021_23097_MOESM1_ESM.pdf [file 41467_2021_23097_MOESM1_ESM.pdf]

## Supplementary Information

### **Clonal evolution and clinical implications of genetic abnormalities in blastic transformation of chronic myeloid leukaemia**

Yotaro Ochi, Kenichi Yoshida, Ying-Jung Huang, Ming-Chung Kuo, Yasuhito Nannya, Ko Sasaki, Kinuko Mitani, Noriko Hosoya, Nobuhiro Hiramoto, Takayuki Ishikawa, Susan Branford, Naranie Shanmuganathan, Kazuma Ohyashiki, Naoto Takahashi, Tomoiku Takaku, Shun Tsuchiya, Nobuhiro Kanemura, Nobuhiko Nakamura, Yasunori Ueda, Satoshi Yoshihara, Rabindranath Bera, Yusuke Shiozawa, Lanying Zhao, June Takeda, Yosaku Watatani, Rurika Okuda, Hideki Makishima, Yuichi Shiraishi, Kenichi Chiba, Hiroko Tanaka, Masashi Sanada, Akifumi Takaori-Kondo, Satoru Miyano, Seishi Ogawa, and Lee-Yung Shih

# Supplementary Fig. 1

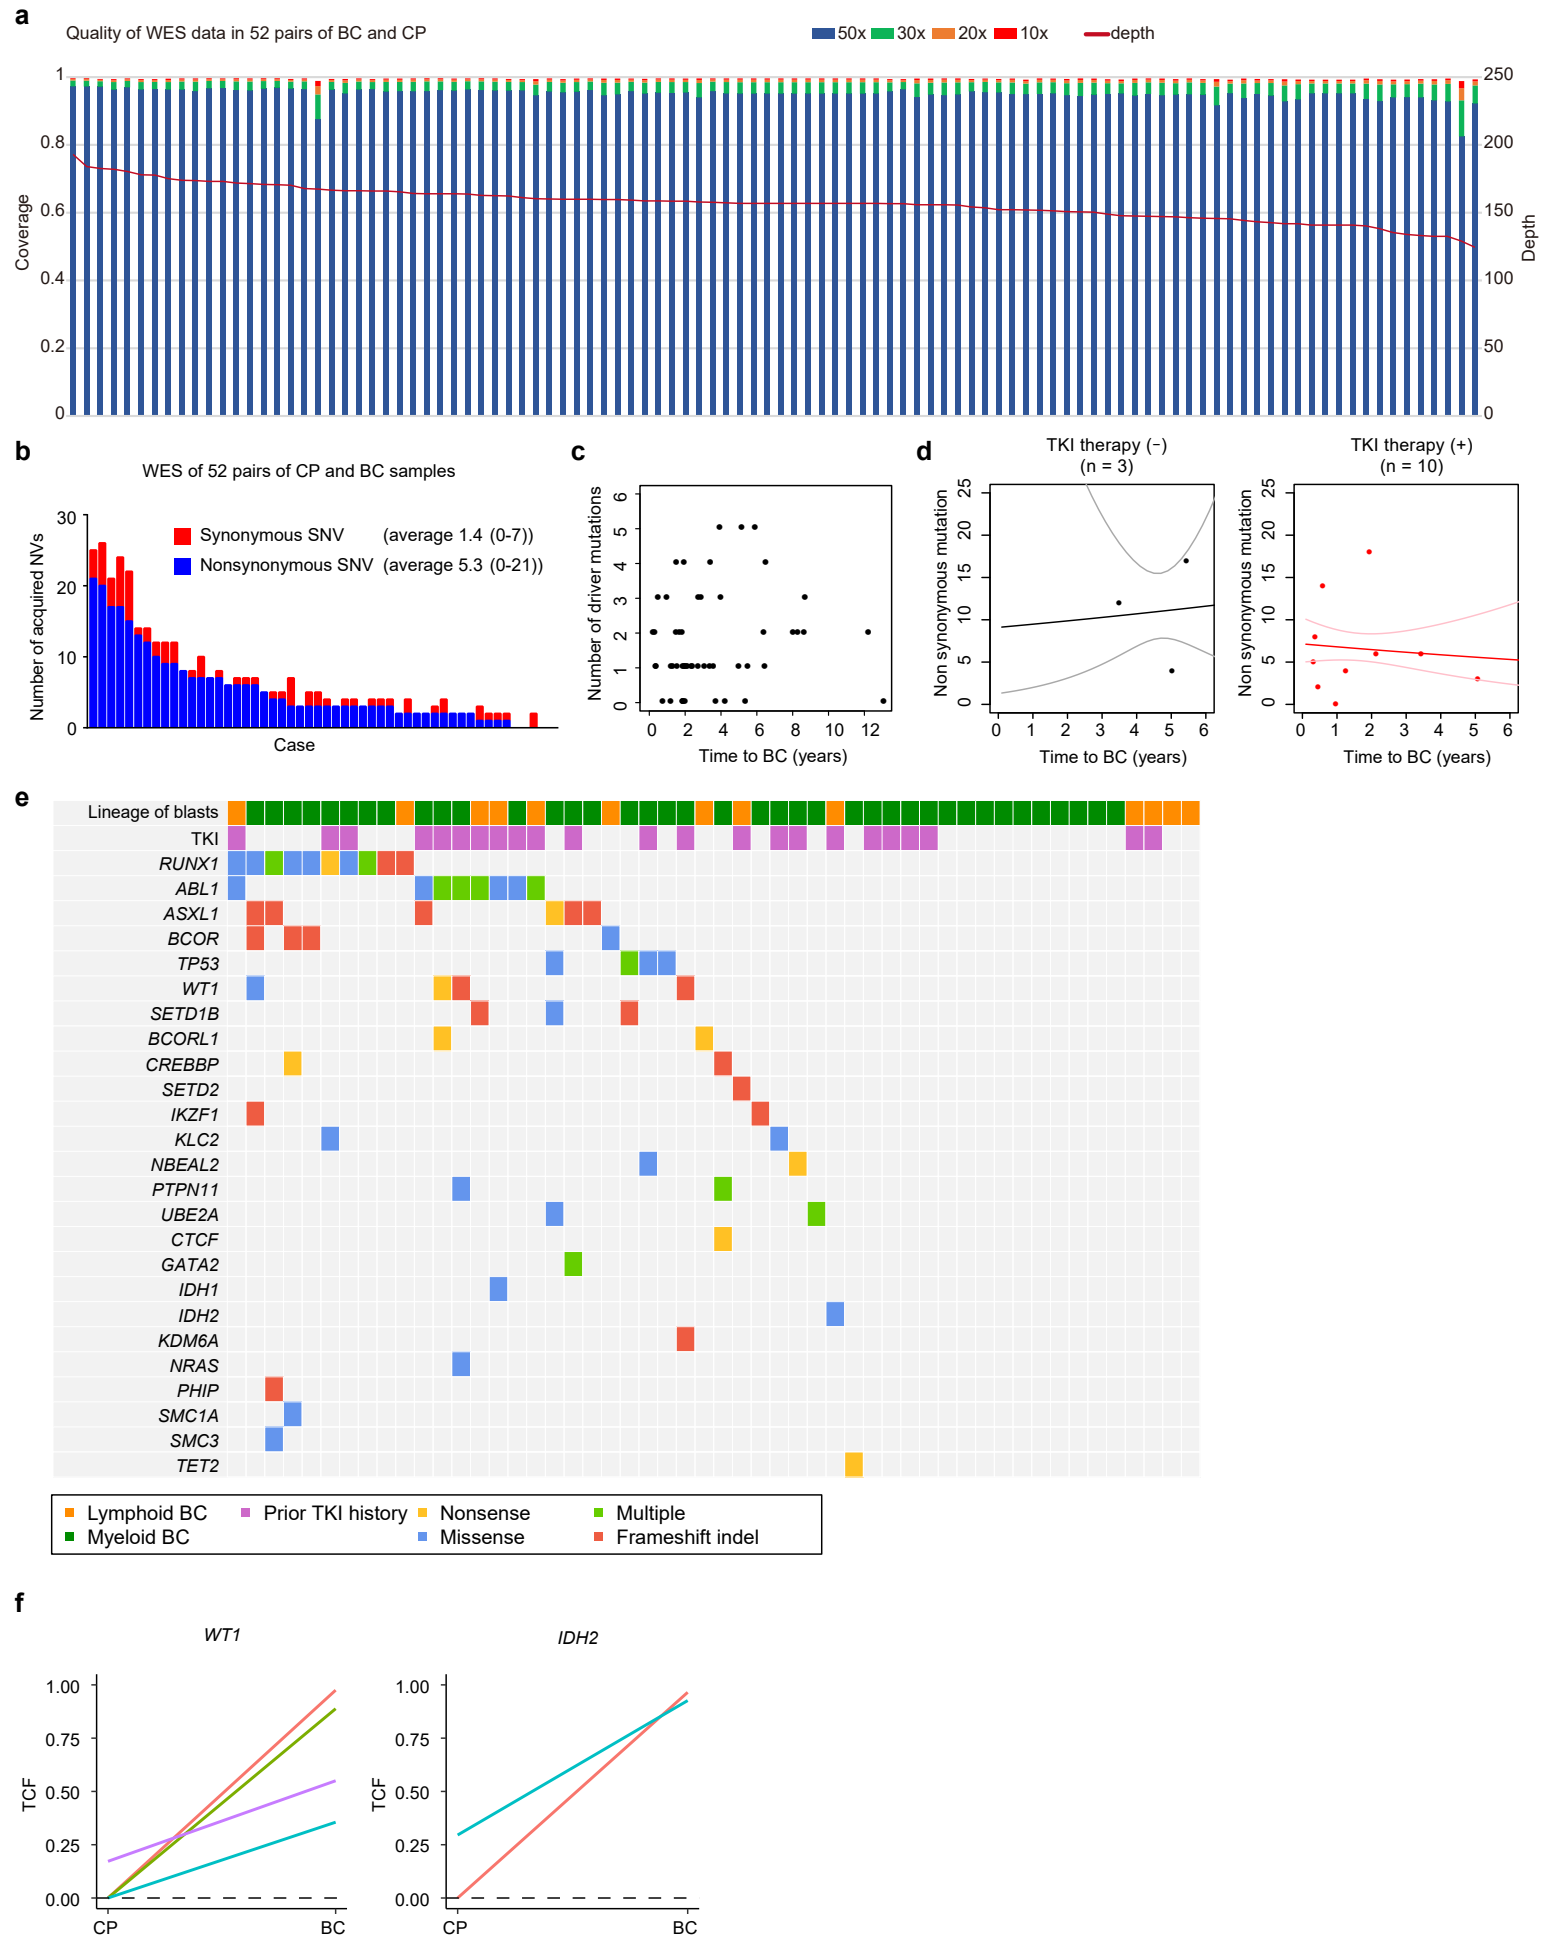

**Supplementary Fig. 1. WES of CML-CP and BC samples.** **a**, Sequencing quality of WES data in 52 pairs of CP and BC samples. Samples were sorted by mean depth. **b**, Number of acquired SNVs during evolution from CP to BC in 52 patients analysed for both CP and BC samples by WES. The average numbers and ranges are also described. **c**, Scatter plots showing time to progression to BC (horizontal axis) and number of recurrent mutations in CML-BC (vertical axis). **d**, Scatter plots for time to progression (horizontal axis) and number of acquired SNVs (vertical axis) during progression from CP to BC in 13 patients from an external cohort. Regression lines with 95% confidence intervals are also plotted. Cases with or without TKI therapy after CP diagnosis are indicated separately. **e**, Summary of mutations in CML-BC patients analysed by WES. Each column indicates one patient. Data on the lineage of blasts and prior history of TKI therapy before BC diagnosis are also shown. Categories of mutations are depicted in different colours, and "multiple" indicates  $\geq 2$  distinct mutations found in the same gene in the same patient. Mutations are ordered by frequency. **f**, TCFs of the indicated mutations in the corresponding CP and BC samples determined by deep amplicon sequencing. Black dashed lines indicate a TCF of 0%. Colours represent individual cases.

## Supplementary Fig. 2

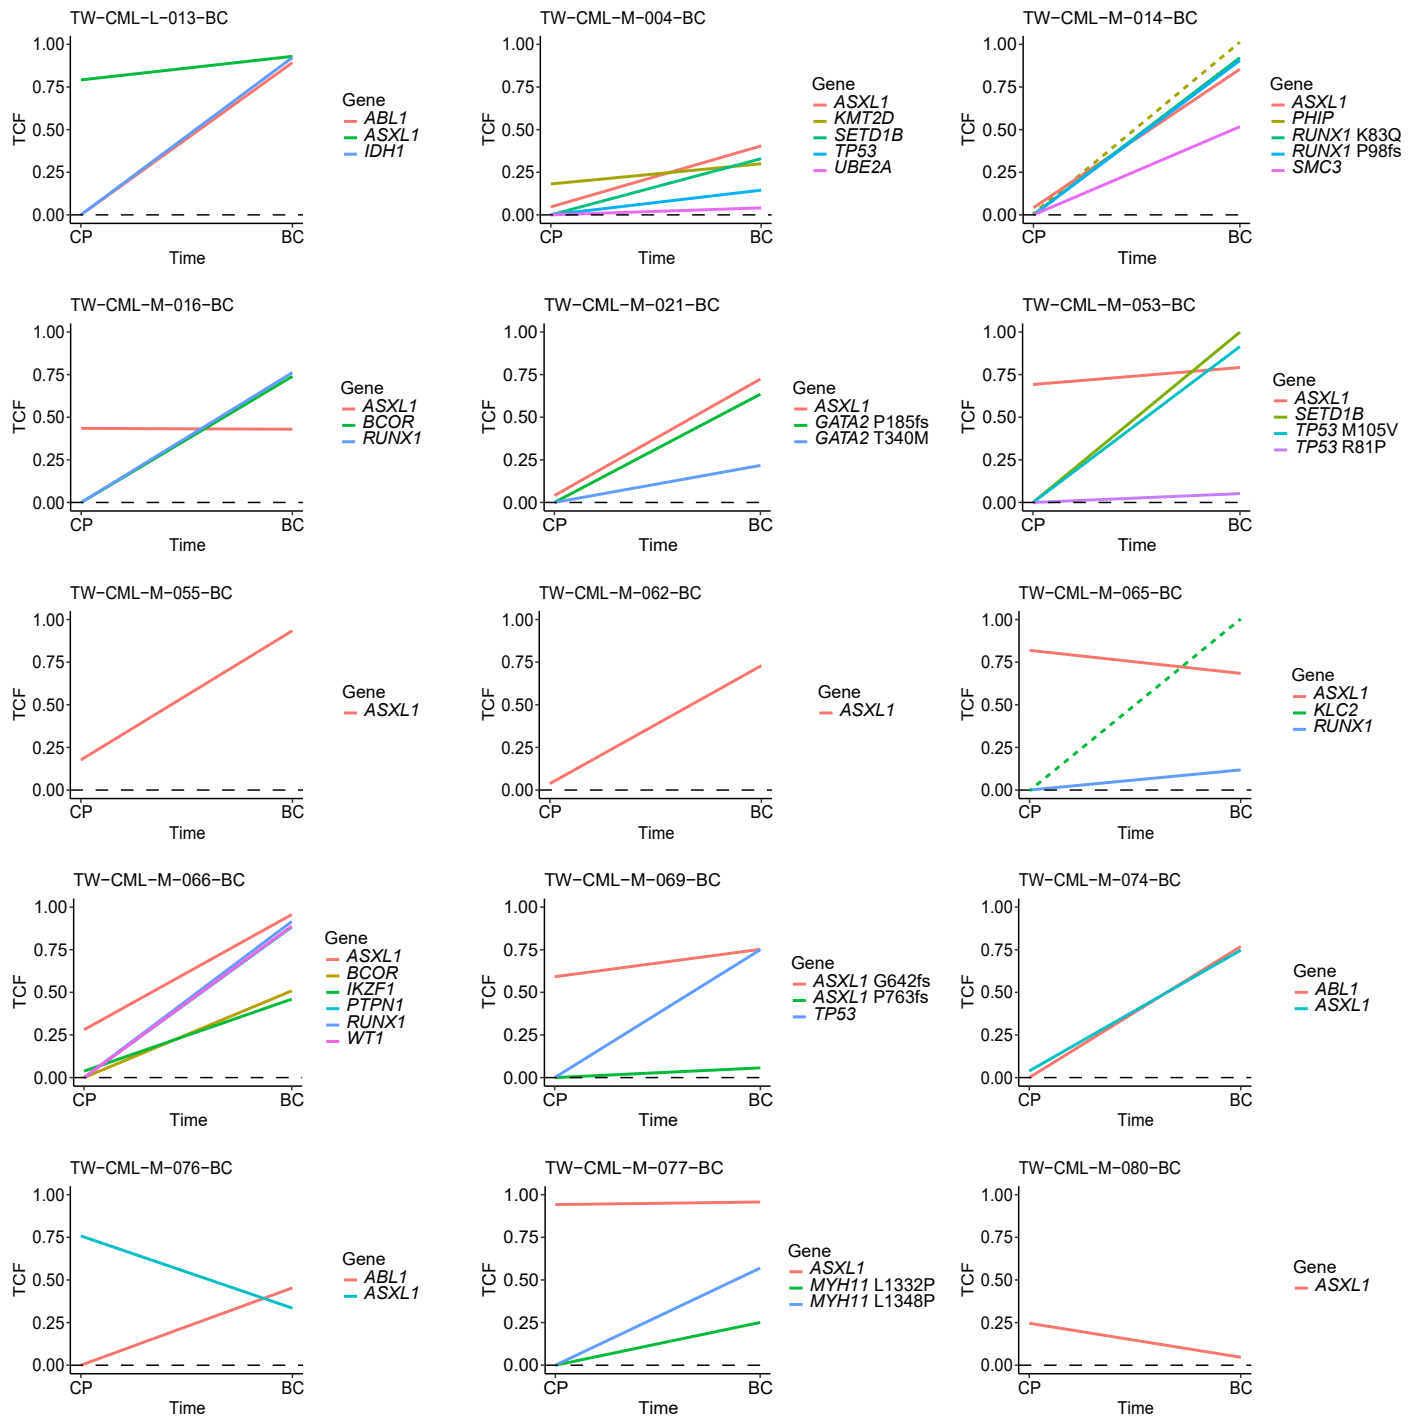

**Supplementary Fig. 2. Relationship between ASXL1 and other mutations during clonal evolution.** TCFs of mutations determined by deep amplicon sequencing in the corresponding CP and BC samples of the indicated cases with ASXL1 mutations. Black dashed lines indicate a TCF of 0%. Colours represent individual mutations. Mutations estimated to be >100% of TCFs are indicated as 100% in dashed lines. Note that two MYH11 mutations (L1332P and L1348P) in a case (TW-CML-M-077) were found in different alleles, which was confirmed by IGV.

### Supplementary Fig. 3

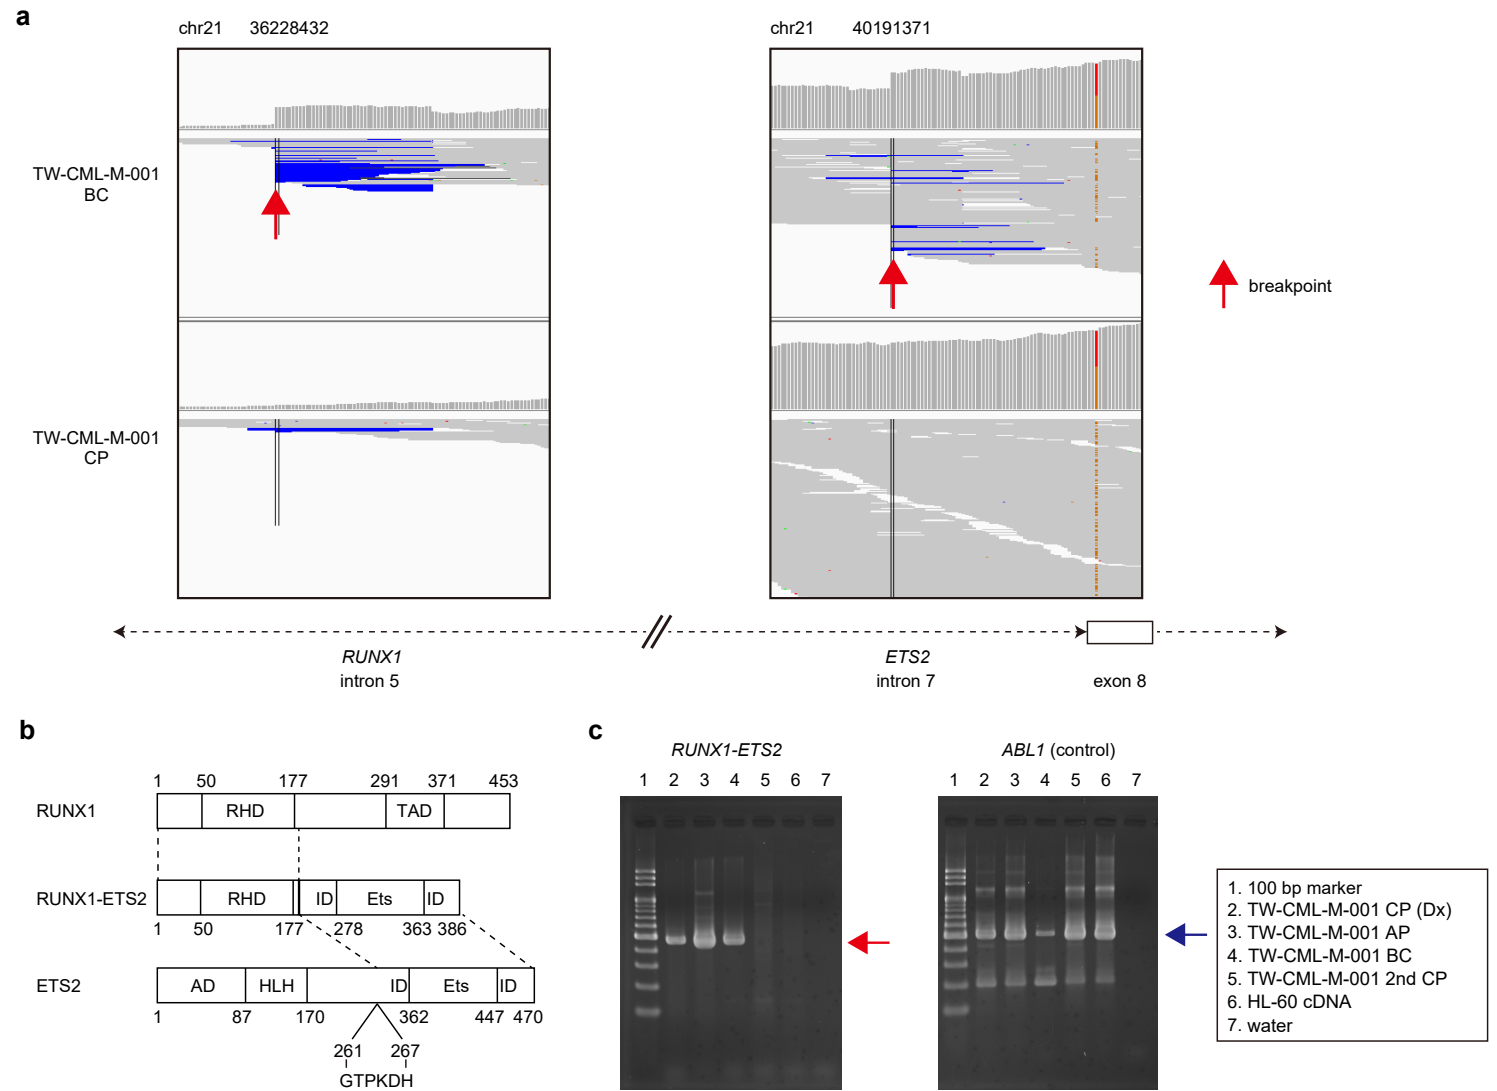

**Supplementary Fig. 3. *RUNX1-ETS2* fusion in a patient with CML.** **a**, Breakpoints of *RUNX1* and *ETS2* gene loci in a case with *RUNX1-ETS2* fusion (TW-CML-M-001), visualised by using the Integrated Genome Viewer (IGV). Although both breakpoints were within intronic regions, our pipeline could detect this SV as the breakpoint in the *ETS2* gene loci was close to the exon and could be captured by WES. **b**, Scheme depicting the expected in-frame fusion protein generated by the *RUNX1-ETS2* fusion. RHD, runt-homology domain; TAD, transactivation domain; AD, activation domain; HLH, helix-loop-helix domain; ID, inhibitory domain; Ets, Ets domain. **c**, RT-PCR of cDNA derived from a patient with *RUNX1-ETS2* fusion at diagnosis of CP, accelerated phase (AP), diagnosis of BC, and secondary CP. HL-60 cell line-derived cDNA and water were used as controls for the experiment. The expected band sizes of amplicons showing *RUNX1-ETS2* fusion and *ABL1* (as a control) are indicated by red and blue arrows, respectively.

## Supplementary Fig. 4

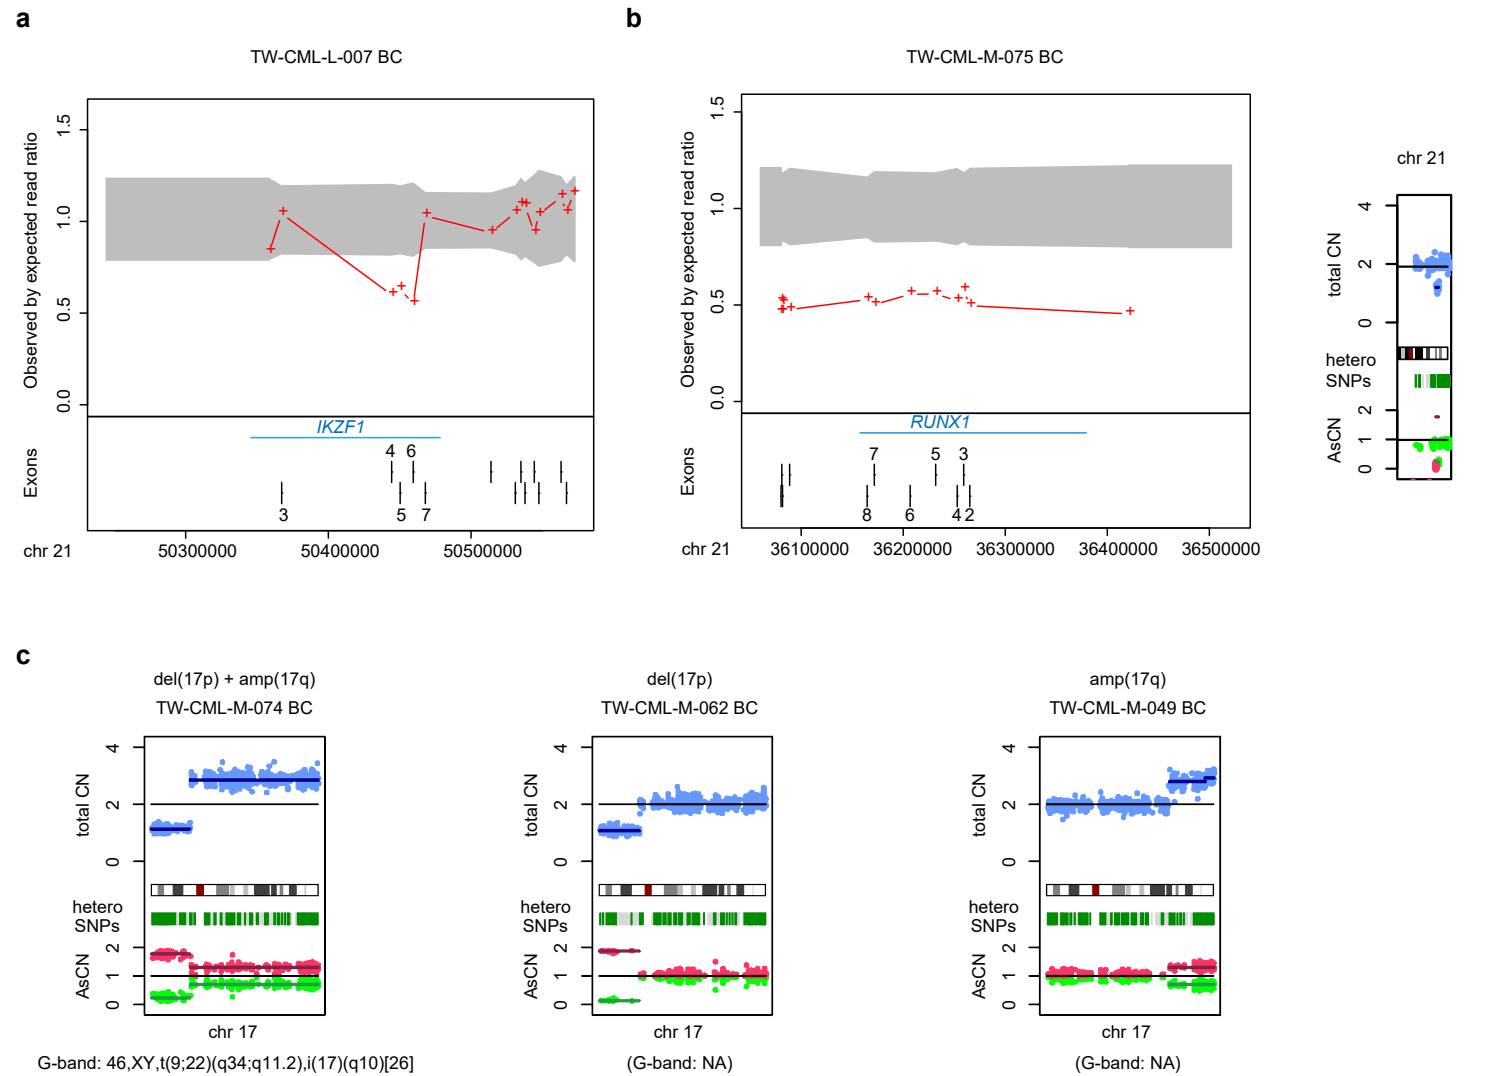

**Supplementary Fig. 4. Detection of focal and chromosomal CNAs.** **a**, Deletion in exons 4-6 of the *IKZF1* gene in a patient with CML-BC (TW-CML-L-007) evaluated by using the ExomeDepth package in R. The ratio between observed and expected read depth and genomic locus are shown in the vertical and horizontal axes, respectively. The 95% confidence interval is marked by using a grey shaded area. **b**, *RUNX1* gene deletion in a patient with CML-BC (TW-CML-M-075) detected by using the ExomeDepth (left) and CNACS algorithm (right). CN, copy-number; AsCN, allele-specific copy-number. **c**, Representative results of sequencing-based copy number profiling showing del(17p) and/or amp(17q). i(17q) is a known driver event in CML-BC, resulting in one copy of 17p and three copies of 17q, and can be successfully detected by conducting sequencing-based copy number profiling, as illustrated in the left panel. We also noticed that a few cases harboured either del(17p) or amp(17q), as represented in the cases illustrated in the middle and right panels. NA, not available.

## Supplementary Fig. 5

a

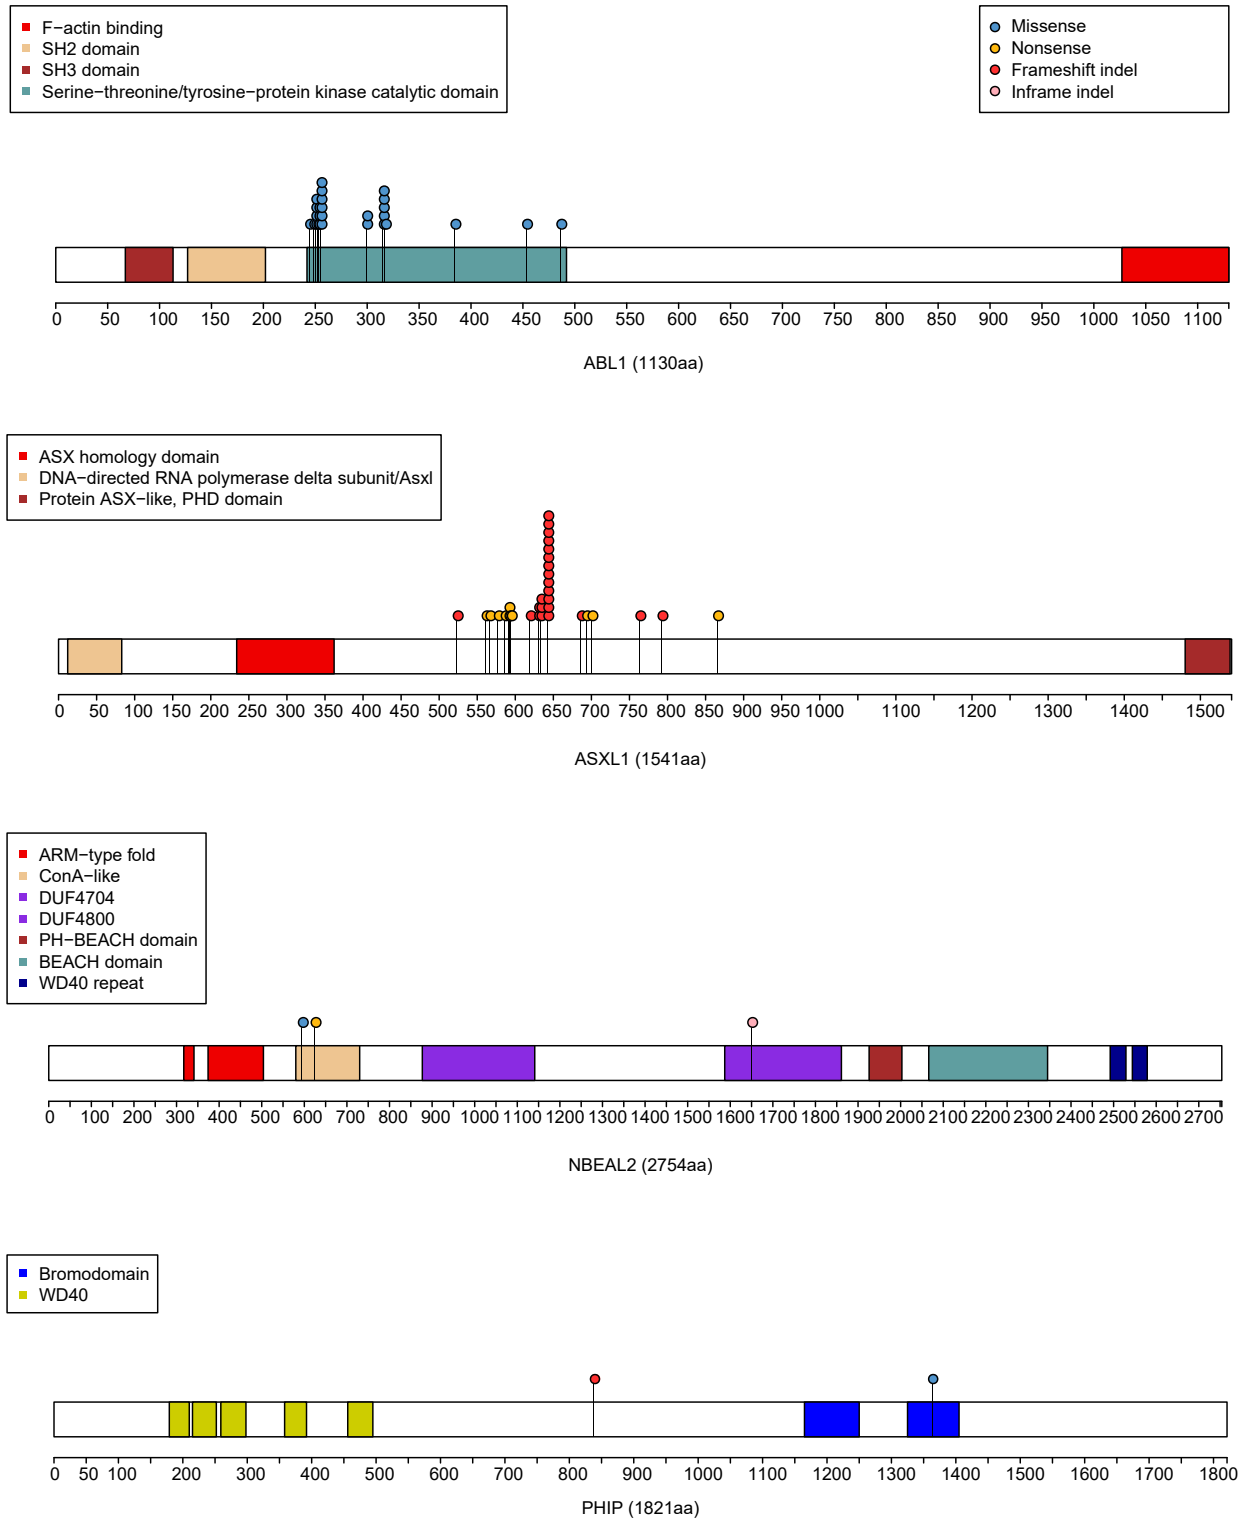

**Supplementary Fig. 5. Distribution of mutations.** Positions and types of mutations in the indicated proteins found in BC patients. Each circle and colour indicate the mutation and type of mutation, respectively. Functional domains are indicated in the coloured bands.

## Supplementary Fig. 6

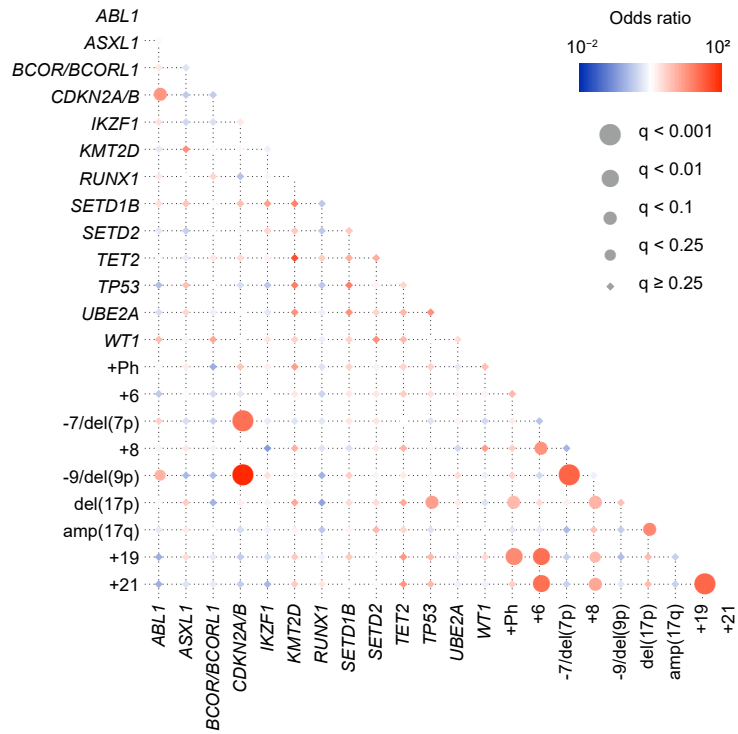

**Supplementary Fig. 6. Correlation between genetic lesions in CML-BC.** Correlations between genetic lesions in CML-BC. Co-occurring and mutually exclusive lesions are shown as red and blue circles, respectively. Odds ratio and the associated q-value are indicated by the colour gradient and the size of the circles, respectively.



# Supplementary Fig. 7

**a**

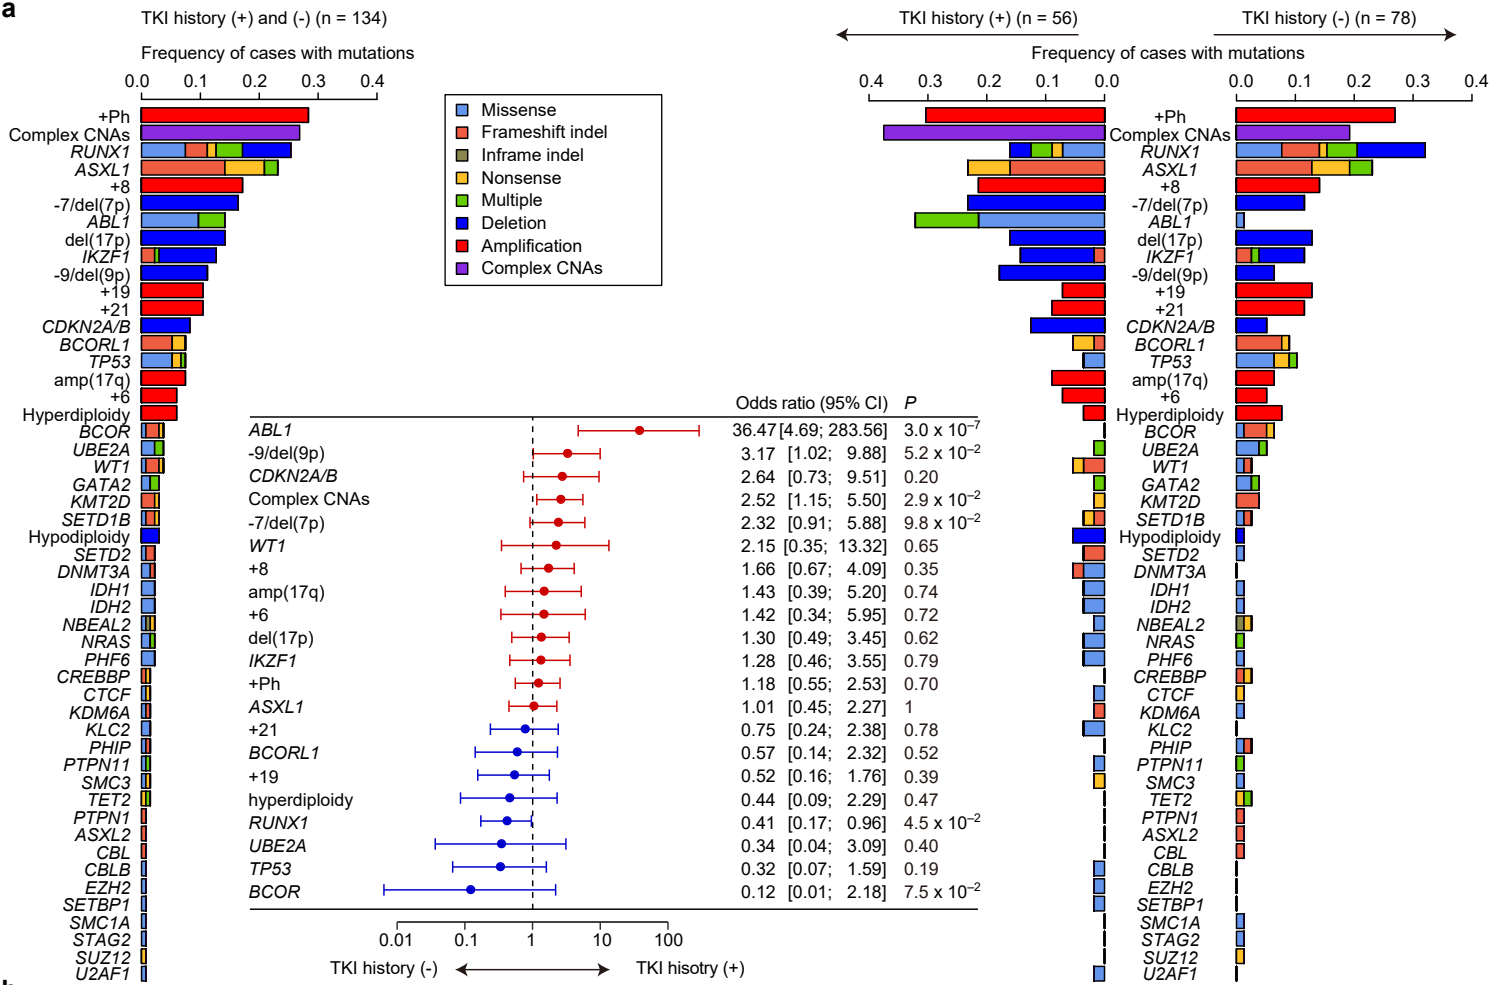

**b**

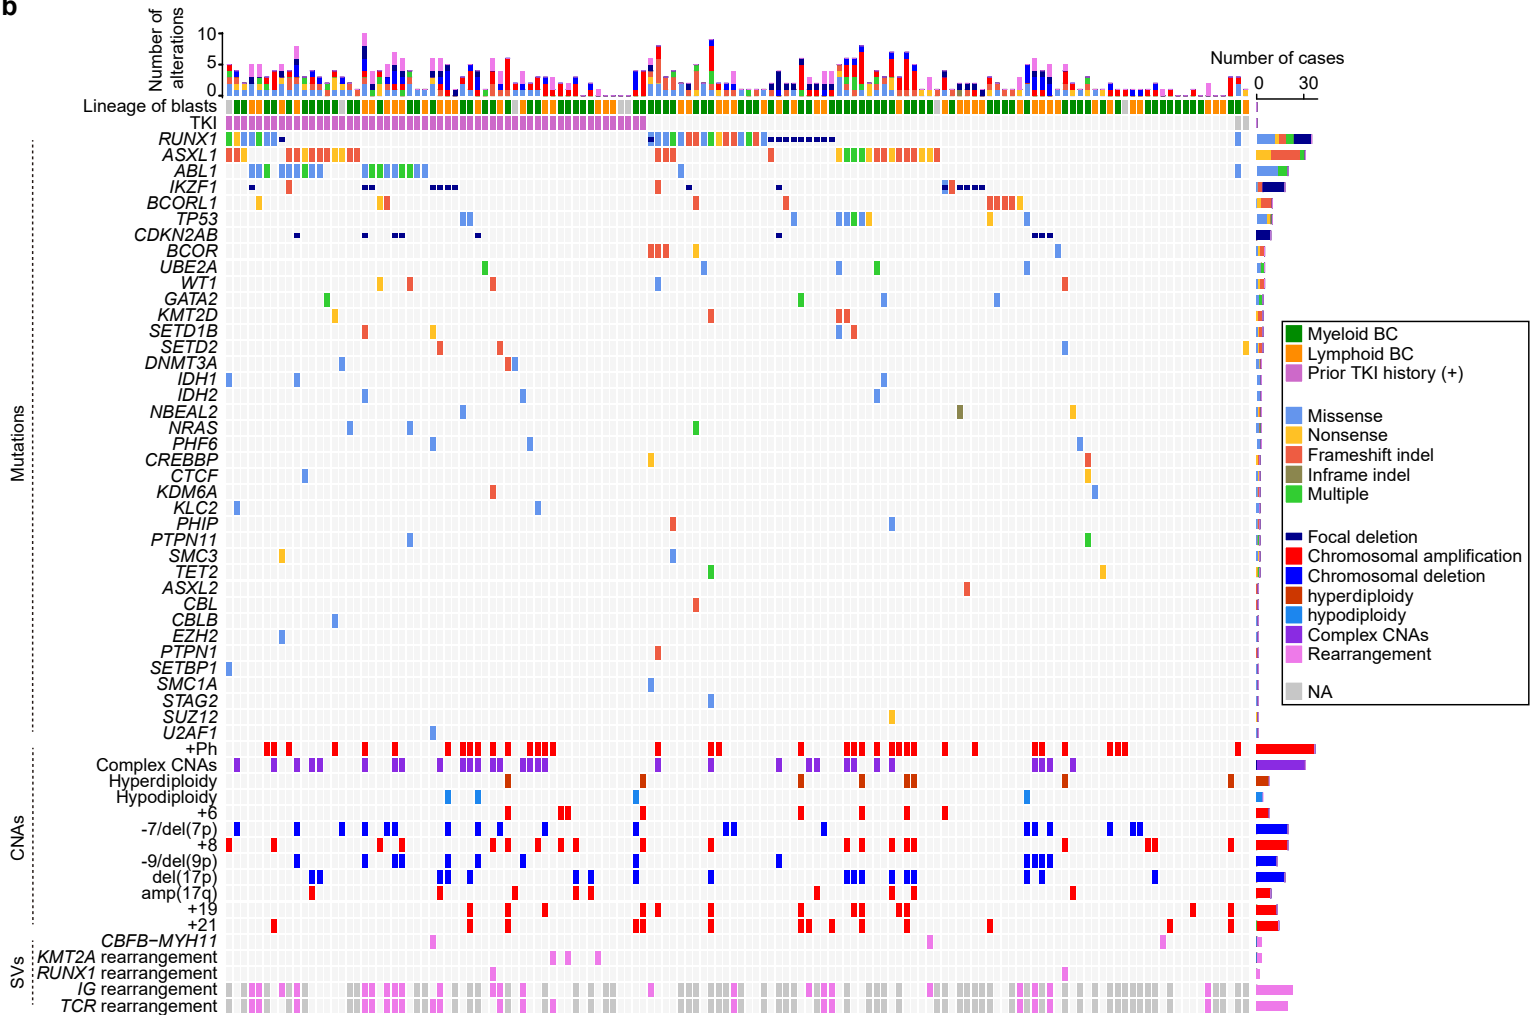

**Supplementary Fig. 7. Genetic landscape of CML-BC with or without prior history of TKI therapy.** **a**, Frequencies of mutations in 134 BC patients evaluable for prior history of TKI therapy (left panel), and those with (n = 56) or without prior TKI treatment history (n = 78) (right panel). Categories of mutations are depicted in different colours, and “multiple” indicates  $\geq 2$  distinct mutations found in the same gene in the same patient. The forest plot at the bottom shows odds ratios with 95% CIs for enrichment of each genetic lesion in cases with a prior history of TKI therapy. The dashed line represents an odds ratio of 1. Positive and negative odds ratios are indicated by red and blue colours, respectively. Genetic lesions found in  $>4$  cases were included. *P*-values were calculated using the Fisher’s exact test. **b**, Summary of genetic lesions in BC patients with or without prior history of TKI therapy. Each column indicates one patient. Types of alterations are depicted in different colours, and “multiple” indicates  $\geq 2$  distinct mutations found in the same gene in the same patient. The rearrangement of immunoglobulin (*IG*) and T-cell receptor (*TCR*) genes is shown in cases analysed by WES. NA, not available.

**Supplementary Fig. 8**

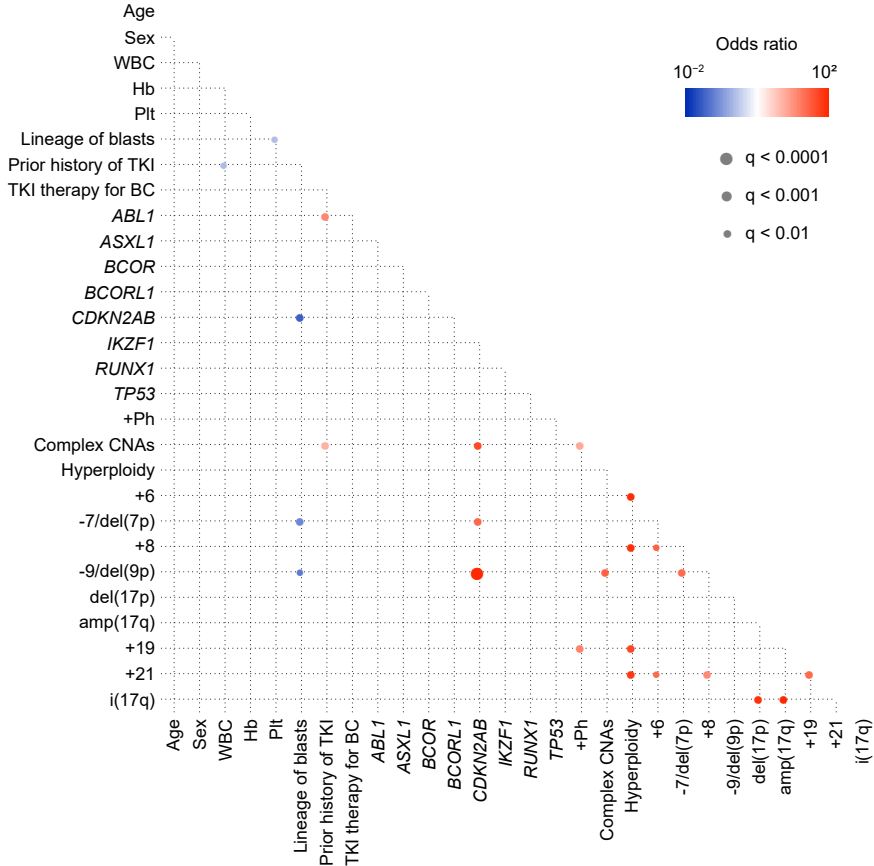

**Supplementary Fig. 8. Correlation of genetic and clinical factors in survival analysis of CML-BC.**

Correlations between genetic/clinical factors in survival analysis of 99 BC patients. Co-occurring and mutually exclusive factors are shown in red and blue circles, respectively. Odds ratio and the associated q-value are indicated by the colour gradient and the size of the circles, respectively.

## Supplementary Fig. 9

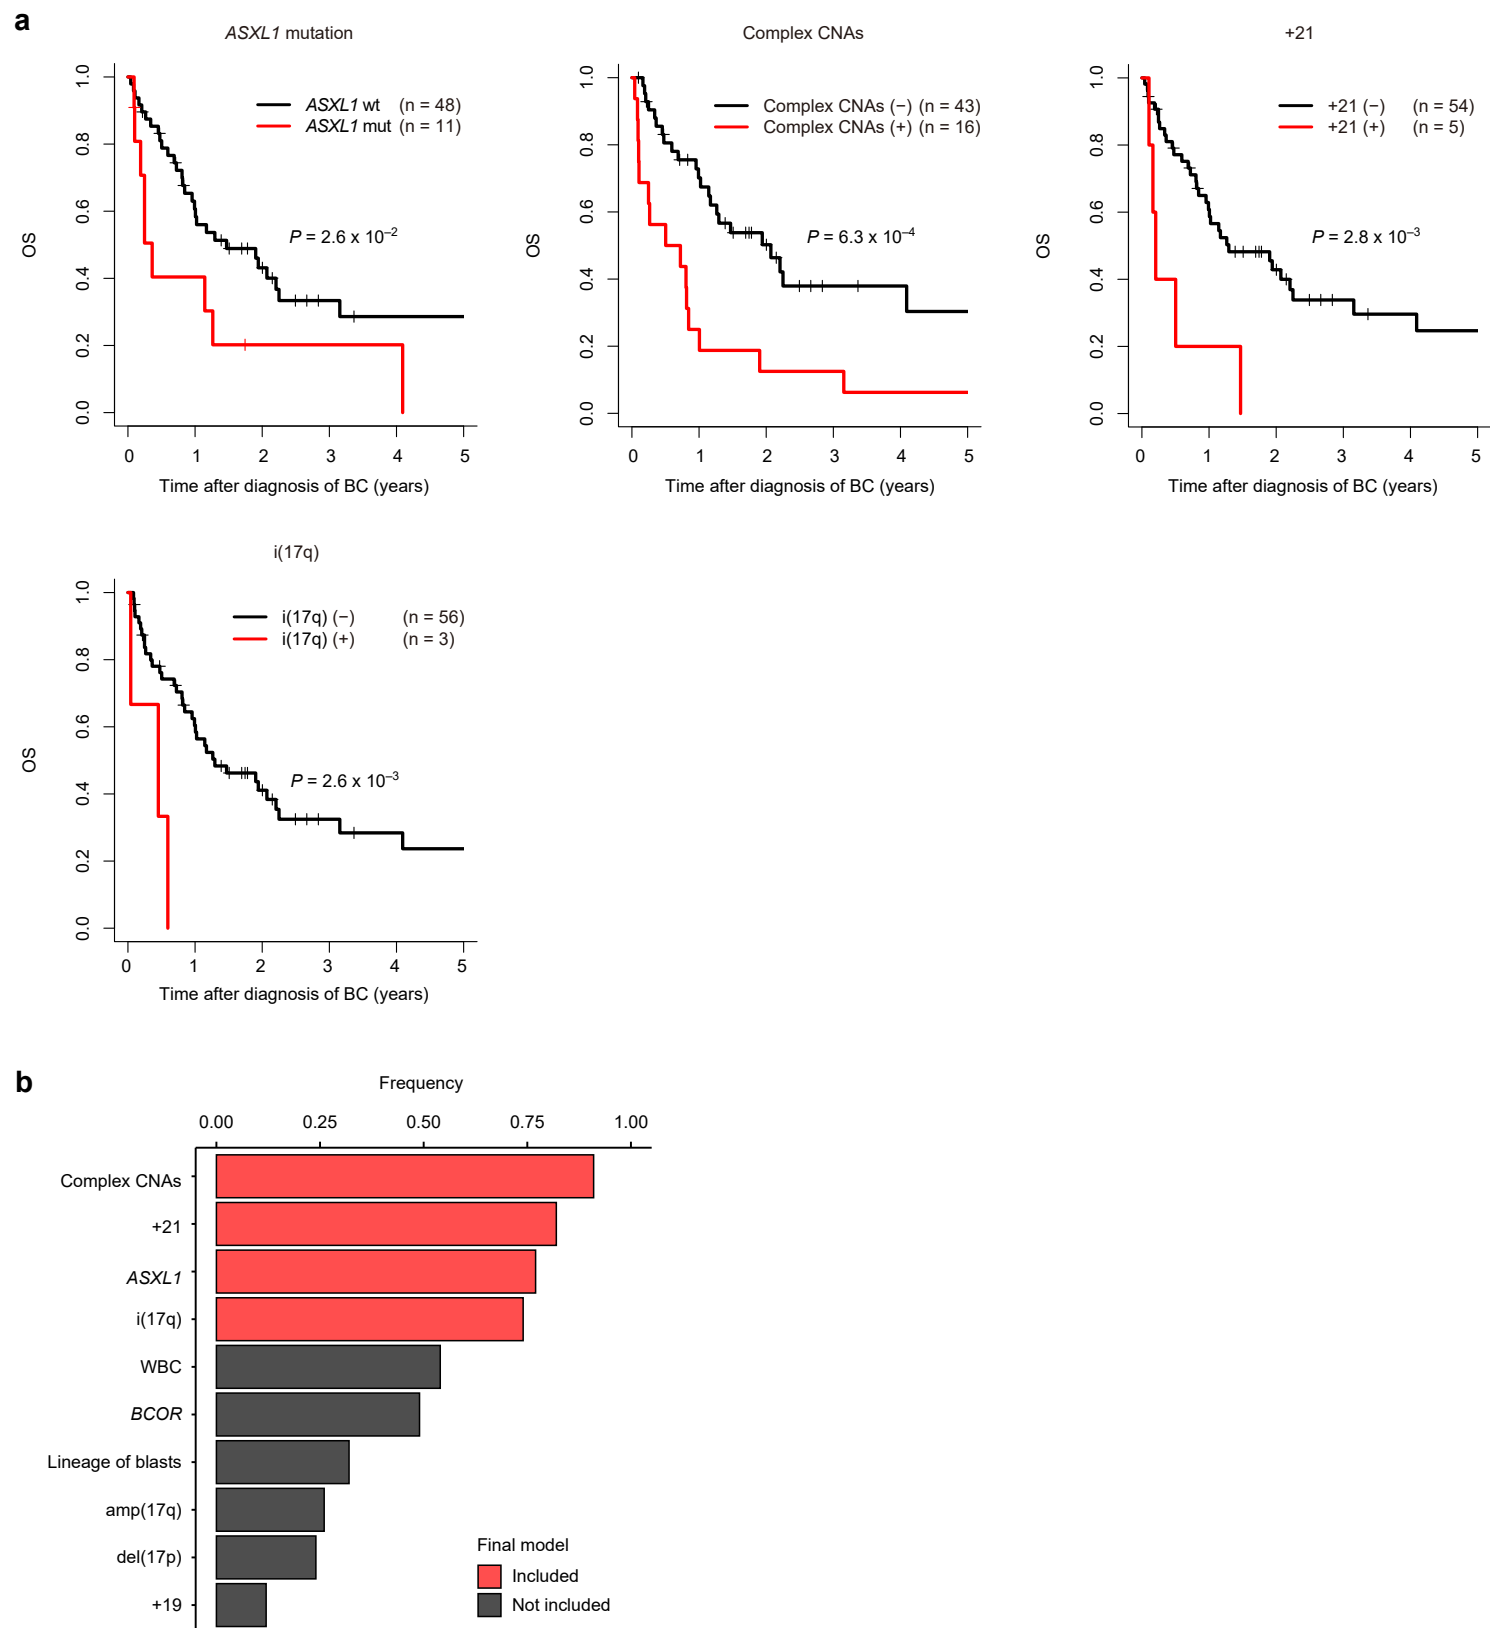

**Supplementary Fig. 9. Prognostic impact of genetic abnormalities in patients with CML-BC treated with TKI-based therapy.** **a**, Kaplan-Meier survival curves for OS in 59 patients with BC who were treated with TKI-based therapy according to the indicated clinical or genetic factors. The prognostic impact of each factor on OS was calculated using the log-rank test. **b**, Frequencies of each variable included in 100 bootstrapping and Cox proportional hazards regression modelling with a stepwise variable selection. The variables included in the final model, shown in Fig. 5b, are indicated in red.

## Supplementary Fig. 10

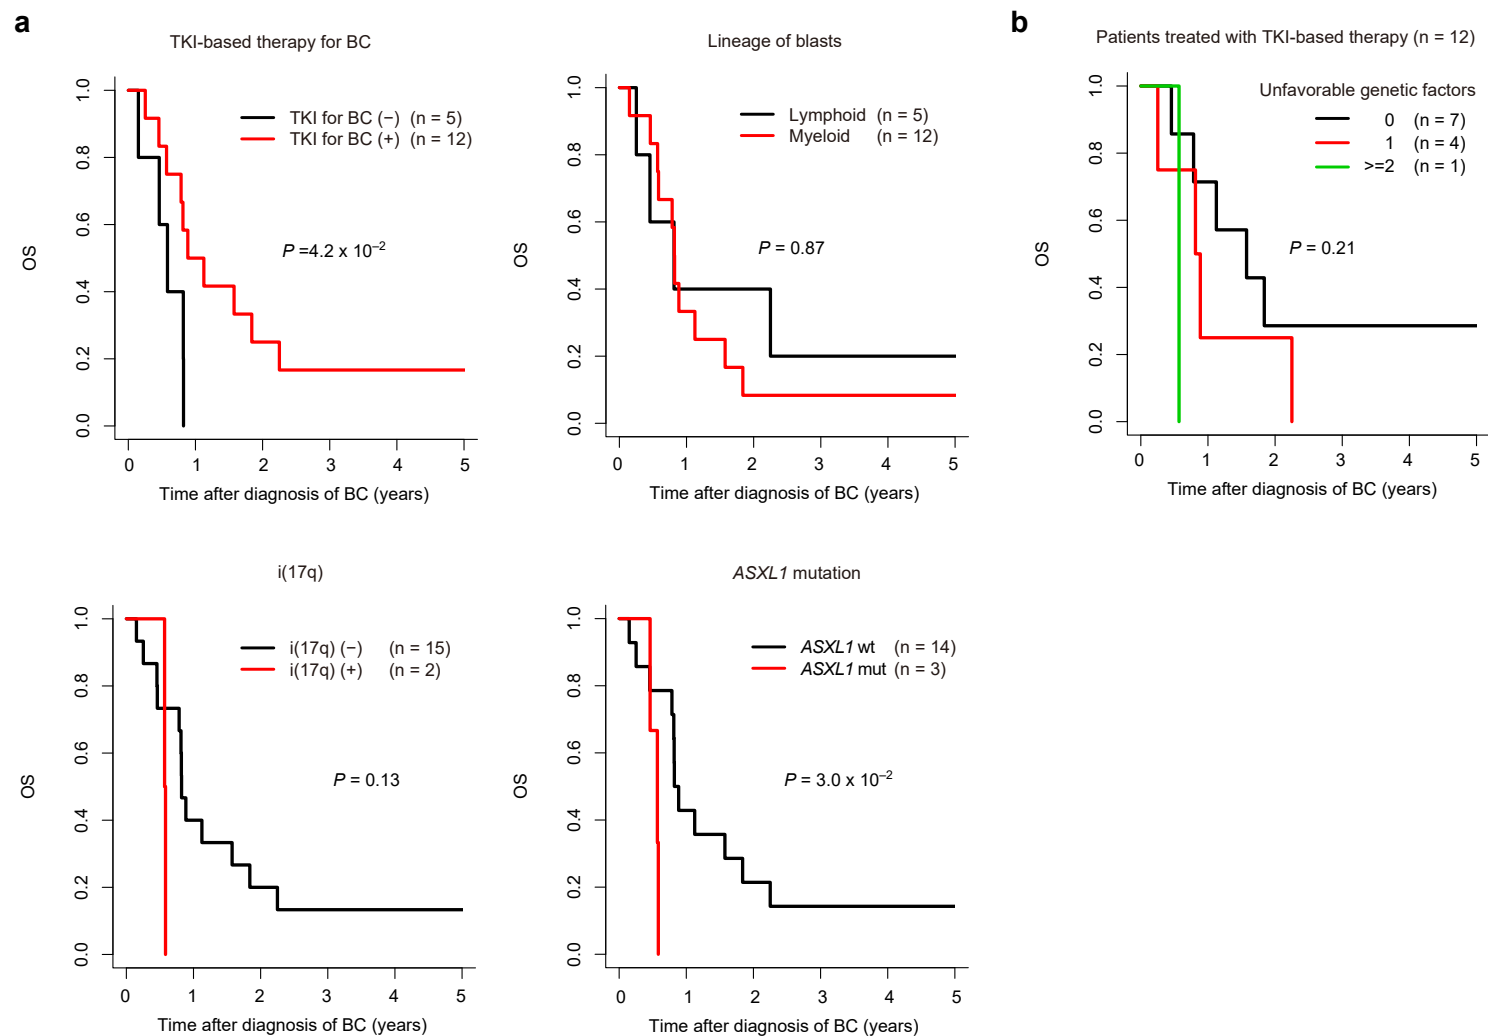

**Supplementary Fig. 10. Prognostic impact of genetic abnormalities in patients with CML-BC in the external cohort. a,** Kaplan-Meier survival curves for OS in 17 patients with BC in the external cohort according to the indicated clinical or genetic factors. The prognostic impact of each factor on OS was calculated using the log-rank test. **b,** Kaplan-Meier survival curves for OS in 12 patients who were treated with TKI-based therapy according to the number of genetic risk factors listed in Fig. 5b. *P*-values were calculated using the log-rank test.



|               |               |     |    |     |    |    |    |     |    |    |                                              |
|---------------|---------------|-----|----|-----|----|----|----|-----|----|----|----------------------------------------------|
| JUN-004       |               | 1   | 0  | 0   | 0  | 1  | 0  | 1   | 0  | 0  | Juntendo University School of Medicine       |
| AKT-001       |               | 1   | 0  | 0   | 0  | 1  | 0  | 1   | 0  | 0  | Akita University Graduate School of Medicine |
| AKT-003       |               | 1   | 0  | 0   | 0  | 1  | 0  | 1   | 0  | 0  | Akita University Graduate School of Medicine |
| AKT-005       |               | 1   | 0  | 0   | 0  | 1  | 0  | 1   | 0  | 0  | Akita University Graduate School of Medicine |
| AKT-006       |               | 1   | 0  | 0   | 0  | 1  | 0  | 1   | 0  | 0  | Akita University Graduate School of Medicine |
| AKT-007       |               | 1   | 0  | 0   | 0  | 1  | 0  | 1   | 0  | 0  | Akita University Graduate School of Medicine |
| KCGH-217-1    |               | 1   | 0  | 0   | 0  | 1  | 0  | 1   | 0  | 0  | Kobe City Medical Center General Hospital    |
| KCGH-350-1    |               | 1   | 0  | 0   | 0  | 1  | 0  | 1   | 0  | 0  | Kobe City Medical Center General Hospital    |
| KCGH-356-1    |               | 1   | 0  | 0   | 0  | 1  | 0  | 1   | 0  | 0  | Kobe City Medical Center General Hospital    |
| KCGH-421-1    |               | 1   | 0  | 0   | 0  | 1  | 0  | 1   | 0  | 0  | Kobe City Medical Center General Hospital    |
| KCGH-444-1    |               | 1   | 0  | 0   | 0  | 1  | 0  | 1   | 0  | 0  | Kobe City Medical Center General Hospital    |
| KCGH-210-1    |               | 1   | 0  | 0   | 0  | 1  | 0  | 1   | 0  | 0  | Kobe City Medical Center General Hospital    |
| KCGH-762-1    |               | 1   | 0  | 0   | 0  | 1  | 0  | 1   | 0  | 0  | Kobe City Medical Center General Hospital    |
| KCH-116-1     |               | 1   | 0  | 0   | 0  | 1  | 0  | 1   | 0  | 0  | Kurashiki Central Hospital                   |
| 1 MBC Dx.WES  |               | 1   | 1  | 0   | 1  | 0  | 0  | 0   | 0  | 1  | Branford et al. Blood 2018                   |
| 10_LBC.WES    | 10_CP_Dx.WES  | 1   | 1  | 1   | 0  | 0  | 0  | 0   | 0  | 1  | Branford et al. Blood 2018                   |
|               | 11_CP_Dx.WES  | 1   | 0  | 1   | 1  | 0  | 0  | 0   | 0  | 1  | Branford et al. Blood 2018                   |
| 12_LBC.WES    | 12_CP_Dx.WES  | 1   | 1  | 1   | 1  | 0  | 0  | 0   | 0  | 1  | Branford et al. Blood 2018                   |
| 13_LBC.WES    | 13_CP_Dx.WES  | 1   | 1  | 1   | 1  | 0  | 0  | 0   | 0  | 1  | Branford et al. Blood 2018                   |
| 14_LBC.WES    | 14_CP_Dx.WES  | 1   | 1  | 1   | 1  | 0  | 0  | 0   | 0  | 1  | Branford et al. Blood 2018                   |
| 15_MBC.WES    | 15_CP_Dx.WES  | 1   | 1  | 1   | 1  | 0  | 0  | 0   | 0  | 1  | Branford et al. Blood 2018                   |
| 16_LBC.WES    | 16_CP_Dx.WES  | 1   | 1  | 1   | 1  | 0  | 0  | 0   | 0  | 1  | Branford et al. Blood 2018                   |
| 17_MBC.WES    | 17_CP_Dx.WES  | 1   | 1  | 1   | 1  | 0  | 0  | 0   | 0  | 1  | Branford et al. Blood 2018                   |
| 18_MBC.WES    | 18_CP_Dx.WES  | 1   | 1  | 1   | 1  | 0  | 0  | 0   | 0  | 1  | Branford et al. Blood 2018                   |
| 19_MBC.WES    | 19_CP_Dx.WES  | 1   | 1  | 1   | 1  | 0  | 0  | 0   | 0  | 1  | Branford et al. Blood 2018                   |
| 2_MBC Dx.WES  |               | 1   | 1  | 0   | 1  | 0  | 0  | 0   | 0  | 1  | Branford et al. Blood 2018                   |
| 20_MBC.WES    |               | 1   | 1  | 0   | 1  | 0  | 0  | 0   | 0  | 1  | Branford et al. Blood 2018                   |
| 21_MBC.WES    | 21_CP_Dx.WES  | 1   | 1  | 1   | 1  | 0  | 0  | 0   | 0  | 1  | Branford et al. Blood 2018                   |
| 22_MBC.WES    |               | 1   | 1  | 0   | 1  | 0  | 0  | 0   | 0  | 1  | Branford et al. Blood 2018                   |
| 23_MBC.WES    | 23_CP_Dx.WES  | 1   | 1  | 1   | 1  | 0  | 0  | 0   | 0  | 1  | Branford et al. Blood 2018                   |
|               | 24_CP_Dx.WES  | 1   | 0  | 1   | 1  | 0  | 0  | 0   | 0  | 1  | Branford et al. Blood 2018                   |
|               | 25_CP_Dx.WES  | 1   | 0  | 1   | 1  | 0  | 0  | 0   | 0  | 1  | Branford et al. Blood 2018                   |
|               | 26_CP_Dx.WES  | 1   | 0  | 1   | 1  | 0  | 0  | 0   | 0  | 1  | Branford et al. Blood 2018                   |
|               | 27_CP_Dx.WES  | 1   | 0  | 1   | 1  | 0  | 0  | 0   | 0  | 1  | Branford et al. Blood 2018                   |
|               | 28_CP_Dx.WES  | 1   | 0  | 1   | 1  | 0  | 0  | 0   | 0  | 1  | Branford et al. Blood 2018                   |
|               | 29_CP_Dx.WES  | 1   | 0  | 1   | 1  | 0  | 0  | 0   | 0  | 1  | Branford et al. Blood 2018                   |
| 3_MBC.WES     |               | 1   | 1  | 0   | 1  | 0  | 0  | 0   | 0  | 1  | Branford et al. Blood 2018                   |
|               | 30_CP_Dx.WES  | 1   | 0  | 1   | 1  | 0  | 0  | 0   | 0  | 1  | Branford et al. Blood 2018                   |
|               | 31_CP_Dx.WES  | 1   | 0  | 1   | 1  | 0  | 0  | 0   | 0  | 1  | Branford et al. Blood 2018                   |
|               | 32_CP_Dx.WES  | 1   | 0  | 1   | 1  | 0  | 0  | 0   | 0  | 1  | Branford et al. Blood 2018                   |
|               | 33_CP_Dx.WES  | 1   | 0  | 1   | 1  | 0  | 0  | 0   | 0  | 1  | Branford et al. Blood 2018                   |
|               | 34_CP_Dx.WES  | 1   | 0  | 1   | 1  | 0  | 0  | 0   | 0  | 1  | Branford et al. Blood 2018                   |
|               | 35_CP_Dx.WES  | 1   | 0  | 1   | 1  | 0  | 0  | 0   | 0  | 1  | Branford et al. Blood 2018                   |
|               | 36_CP_Dx.WES  | 1   | 0  | 1   | 1  | 0  | 0  | 0   | 0  | 1  | Branford et al. Blood 2018                   |
|               | 37_CP_Dx.WES  | 1   | 0  | 1   | 1  | 0  | 0  | 0   | 0  | 1  | Branford et al. Blood 2018                   |
| 4_LBC.WES     | 4_CP_Dx.WES   | 1   | 1  | 1   | 1  | 0  | 0  | 0   | 0  | 1  | Branford et al. Blood 2018                   |
|               | 5_CP_Dx.WES   | 1   | 0  | 1   | 1  | 0  | 0  | 0   | 0  | 1  | Branford et al. Blood 2018                   |
|               | 51_CP.WES     | 1   | 0  | 1   | 1  | 0  | 0  | 0   | 0  | 1  | Branford et al. Blood 2018                   |
| 6_MBC.WES     | 6_CP_Dx.WES   | 1   | 1  | 1   | 1  | 0  | 0  | 0   | 0  | 1  | Branford et al. Blood 2018                   |
| 7_LBC.WES     | 7_CP_Dx.WES   | 1   | 1  | 1   | 0  | 0  | 0  | 0   | 0  | 1  | Branford et al. Blood 2018                   |
|               | 8_CP_Dx.WES   | 1   | 0  | 1   | 1  | 0  | 0  | 0   | 0  | 1  | Branford et al. Blood 2018                   |
| 9_LBC.WES     | 9_CP_Dx.WES   | 1   | 1  | 1   | 1  | 0  | 0  | 0   | 0  | 1  | Branford et al. Blood 2018                   |
|               | CML212_103_CP | 1   | 0  | 1   | 1  | 0  | 0  | 0   | 0  | 1  | Togasaki et al. Blood Cancer J 2017          |
|               | CML212_104_CP | 1   | 0  | 1   | 1  | 0  | 0  | 0   | 0  | 1  | Togasaki et al. Blood Cancer J 2017          |
|               | CML212_109_CP | 1   | 0  | 1   | 1  | 0  | 0  | 0   | 0  | 1  | Togasaki et al. Blood Cancer J 2017          |
|               | CML212_114_CP | 1   | 0  | 1   | 1  | 0  | 0  | 0   | 0  | 1  | Togasaki et al. Blood Cancer J 2017          |
|               | CML212_125_CP | 1   | 0  | 1   | 1  | 0  | 0  | 0   | 0  | 1  | Togasaki et al. Blood Cancer J 2017          |
|               | CML212_128_CP | 1   | 0  | 1   | 1  | 0  | 0  | 0   | 0  | 1  | Togasaki et al. Blood Cancer J 2017          |
|               | CML212_129_CP | 1   | 0  | 1   | 1  | 0  | 0  | 0   | 0  | 1  | Togasaki et al. Blood Cancer J 2017          |
|               | CML212_130_CP | 1   | 0  | 1   | 1  | 0  | 0  | 0   | 0  | 1  | Togasaki et al. Blood Cancer J 2017          |
|               | CML212_131_CP | 1   | 0  | 1   | 1  | 0  | 0  | 0   | 0  | 1  | Togasaki et al. Blood Cancer J 2017          |
|               | CML212_137_CP | 1   | 0  | 1   | 1  | 0  | 0  | 0   | 0  | 1  | Togasaki et al. Blood Cancer J 2017          |
|               | CML212_141_CP | 1   | 0  | 1   | 1  | 0  | 0  | 0   | 0  | 1  | Togasaki et al. Blood Cancer J 2017          |
|               | CML212_147_CP | 1   | 0  | 1   | 1  | 0  | 0  | 0   | 0  | 1  | Togasaki et al. Blood Cancer J 2017          |
|               | CML212_148_CP | 1   | 0  | 1   | 1  | 0  | 0  | 0   | 0  | 1  | Togasaki et al. Blood Cancer J 2017          |
|               | CML212_152_CP | 1   | 0  | 1   | 1  | 0  | 0  | 0   | 0  | 1  | Togasaki et al. Blood Cancer J 2017          |
|               | CML212_154_CP | 1   | 0  | 1   | 1  | 0  | 0  | 0   | 0  | 1  | Togasaki et al. Blood Cancer J 2017          |
|               | CML212_155_CP | 1   | 0  | 1   | 1  | 0  | 0  | 0   | 0  | 1  | Togasaki et al. Blood Cancer J 2017          |
|               | CML212_165_CP | 1   | 0  | 1   | 1  | 0  | 0  | 0   | 0  | 1  | Togasaki et al. Blood Cancer J 2017          |
|               | CML212_182_CP | 1   | 0  | 1   | 1  | 0  | 0  | 0   | 0  | 1  | Togasaki et al. Blood Cancer J 2017          |
|               | CML212_197_CP | 1   | 0  | 1   | 1  | 0  | 0  | 0   | 0  | 1  | Togasaki et al. Blood Cancer J 2017          |
|               | CML212_203_CP | 1   | 0  | 1   | 1  | 0  | 0  | 0   | 0  | 1  | Togasaki et al. Blood Cancer J 2017          |
|               | CML212_204_CP | 1   | 0  | 1   | 1  | 0  | 0  | 0   | 0  | 1  | Togasaki et al. Blood Cancer J 2017          |
|               | CML212_208_CP | 1   | 0  | 1   | 1  | 0  | 0  | 0   | 0  | 1  | Togasaki et al. Blood Cancer J 2017          |
|               | CML212_222_CP | 1   | 0  | 1   | 1  | 0  | 0  | 0   | 0  | 1  | Togasaki et al. Blood Cancer J 2017          |
|               | CML212_223_CP | 1   | 0  | 1   | 1  | 0  | 0  | 0   | 0  | 1  | Togasaki et al. Blood Cancer J 2017          |
|               | DU01_CP       | 1   | 0  | 1   | 1  | 0  | 0  | 0   | 0  | 1  | Mitani et al. Blood 2016                     |
|               | DU02_CP       | 1   | 0  | 1   | 1  | 0  | 0  | 0   | 0  | 1  | Mitani et al. Blood 2016                     |
|               | DU03_CP       | 1   | 0  | 1   | 1  | 0  | 0  | 0   | 0  | 1  | Mitani et al. Blood 2016                     |
|               | DU04_CP       | 1   | 0  | 1   | 1  | 0  | 0  | 0   | 0  | 1  | Mitani et al. Blood 2016                     |
|               | DU05_CP       | 1   | 0  | 1   | 1  | 0  | 0  | 0   | 0  | 1  | Mitani et al. Blood 2016                     |
|               | DU06_CP       | 1   | 0  | 1   | 1  | 0  | 0  | 0   | 0  | 1  | Mitani et al. Blood 2016                     |
|               | DU07_CP       | 1   | 0  | 1   | 1  | 0  | 0  | 0   | 0  | 1  | Mitani et al. Blood 2016                     |
|               | DU08_CP       | 1   | 0  | 1   | 1  | 0  | 0  | 0   | 0  | 1  | Mitani et al. Blood 2016                     |
|               | DU09_CP       | 1   | 0  | 1   | 1  | 0  | 0  | 0   | 0  | 1  | Mitani et al. Blood 2016                     |
|               | DU10_CP       | 1   | 0  | 1   | 1  | 0  | 0  | 0   | 0  | 1  | Mitani et al. Blood 2016                     |
|               | DU11_CP       | 1   | 0  | 1   | 1  | 0  | 0  | 0   | 0  | 1  | Mitani et al. Blood 2016                     |
|               | DU12_CP       | 1   | 0  | 1   | 1  | 0  | 0  | 0   | 0  | 1  | Mitani et al. Blood 2016                     |
|               | DU13_CP       | 1   | 0  | 1   | 1  | 0  | 0  | 0   | 0  | 1  | Mitani et al. Blood 2016                     |
|               | DU14_CP       | 1   | 0  | 1   | 1  | 0  | 0  | 0   | 0  | 1  | Mitani et al. Blood 2016                     |
|               | DU15_CP       | 1   | 0  | 1   | 1  | 0  | 0  | 0   | 0  | 1  | Mitani et al. Blood 2016                     |
|               | DU16_CP       | 1   | 0  | 1   | 1  | 0  | 0  | 0   | 0  | 1  | Mitani et al. Blood 2016                     |
|               | DU17_CP       | 1   | 0  | 1   | 1  | 0  | 0  | 0   | 0  | 1  | Mitani et al. Blood 2016                     |
|               | DU18_CP       | 1   | 0  | 1   | 1  | 0  | 0  | 0   | 0  | 1  | Mitani et al. Blood 2016                     |
|               | DU19_CP       | 1   | 0  | 1   | 1  | 0  | 0  | 0   | 0  | 1  | Mitani et al. Blood 2016                     |
|               | DU20_CP       | 1   | 0  | 1   | 1  | 0  | 0  | 0   | 0  | 1  | Mitani et al. Blood 2016                     |
| Case-10-blood |               | 1   | 1  | 0   | 1  | 0  | 0  | 0   | 0  | 1  | Kim et al. Leuk Res 2017                     |
| Case-11-blood |               | 1   | 1  | 0   | 1  | 0  | 0  | 0   | 0  | 1  | Kim et al. Leuk Res 2017                     |
| Case-15-blood |               | 1   | 1  | 0   | 1  | 0  | 0  | 0   | 0  | 1  | Kim et al. Leuk Res 2017                     |
| Case-6-blood  |               | 1   | 1  | 0   | 1  | 0  | 0  | 0   | 0  | 1  | Kim et al. Leuk Res 2017                     |
|               |               | 216 | 76 | 129 | 85 | 60 | 19 | 112 | 71 | 86 |                                              |

WES: whole-exome sequencing  
target: targeted-capture sequencing

**Supplementary Table 2: Gene baits for targeted capture sequencing**

|                |                |              |               |               |              |              |
|----------------|----------------|--------------|---------------|---------------|--------------|--------------|
| <i>ABL1</i>    | <i>CEBPA</i>   | <i>ETV6</i>  | <i>KIT</i>    | <i>PDGFRA</i> | <i>SETD2</i> | <i>UBE2A</i> |
| <i>ARID1A</i>  | <i>CHEK2</i>   | <i>EZH2</i>  | <i>KLC2</i>   | <i>PDS5B</i>  | <i>SF1</i>   | <i>USP9X</i> |
| <i>ARID2</i>   | <i>CREBBP</i>  | <i>FLT3</i>  | <i>KMT2A</i>  | <i>PHF6</i>   | <i>SF3A1</i> | <i>WT1</i>   |
| <i>ASXL1</i>   | <i>CSF3R</i>   | <i>GATA1</i> | <i>KMT2C</i>  | <i>PHIP</i>   | <i>SF3B1</i> | <i>ZRSR2</i> |
| <i>ASXL2</i>   | <i>CSNK1A1</i> | <i>GATA2</i> | <i>KMT2D</i>  | <i>PIGA</i>   | <i>SMC1A</i> |              |
| <i>ATRX</i>    | <i>CTCF</i>    | <i>GNAS</i>  | <i>KMT2E</i>  | <i>PPM1D</i>  | <i>SMC3</i>  |              |
| <i>BCOR</i>    | <i>CUX1</i>    | <i>GNB1</i>  | <i>KRAS</i>   | <i>PRPF8</i>  | <i>SPI1</i>  |              |
| <i>BCORL1</i>  | <i>DCLRE1C</i> | <i>GNB2</i>  | <i>LUC7L2</i> | <i>PTEN</i>   | <i>SRSF2</i> |              |
| <i>BRAF</i>    | <i>DDX41</i>   | <i>HRAS</i>  | <i>MECOM</i>  | <i>PTPN1</i>  | <i>STAG1</i> |              |
| <i>BRCC3</i>   | <i>DNMT3A</i>  | <i>IDH1</i>  | <i>MPL</i>    | <i>PTPN11</i> | <i>STAG2</i> |              |
| <i>CACNA1H</i> | <i>DOT1L</i>   | <i>IDH2</i>  | <i>MYH11</i>  | <i>RAD21</i>  | <i>STAT3</i> |              |
| <i>CALR</i>    | <i>EED</i>     | <i>IKZF1</i> | <i>NBEAL2</i> | <i>RAF1</i>   | <i>SUZ12</i> |              |
| <i>CBFB</i>    | <i>EP300</i>   | <i>IRF1</i>  | <i>NF1</i>    | <i>RUNX1</i>  | <i>TERT</i>  |              |
| <i>CBL</i>     | <i>EPOR</i>    | <i>JAK1</i>  | <i>NIPBL</i>  | <i>SAMD9</i>  | <i>TET2</i>  |              |
| <i>CBLB</i>    | <i>ETNK1</i>   | <i>JAK2</i>  | <i>NOTCH1</i> | <i>SAMD9L</i> | <i>TP53</i>  |              |
| <i>CCND3</i>   | <i>ETS1</i>    | <i>KAT6A</i> | <i>NPM1</i>   | <i>SETBP1</i> | <i>U2AF1</i> |              |
| <i>CDKN2A</i>  | <i>ETS2</i>    | <i>KDM6A</i> | <i>NRAS</i>   | <i>SETD1B</i> | <i>U2AF2</i> |              |



**Supplementary Table 3: Characteristics of patients with CML-CP**

|                                                    |                |
|----------------------------------------------------|----------------|
| Number of cases                                    | 148            |
| Age at CP diagnosis (y), median (range) (n = 132)  | 49 (14-88)     |
| Sex, n (%) (n = 71)                                |                |
| Male                                               | 43 (60.6)      |
| Female                                             | 28 (39.4)      |
| TKI use, n (%) (n = 148)                           |                |
| Yes                                                | 115 (77.7)     |
| No                                                 | 33 (22.3)      |
| Initial TKI, n (%) (n = 60)                        |                |
| Imatinib                                           | 48 (80.0)      |
| Nilotinib                                          | 7 (11.7)       |
| Dasatinib                                          | 5 (8.3)        |
| Best response to TKI, n (%) (n = 106)              |                |
| MMR/CMR                                            | 68 (64.2)      |
| CCyR                                               | 8 (7.5)        |
| MCyR                                               | 10 (9.4)       |
| CHR                                                | 19 (17.9)      |
| No haematologic remission                          | 1 (0.9)        |
| Progression to BC, n (%) (n = 148)                 |                |
| Yes                                                | 71 (48.0)      |
| No                                                 | 77 (52.0)      |
| Time to BC diagnosis (d), median (range) (n = 70)  | 810 (21-4,653) |
| Final status, n (%) (n = 71)                       |                |
| Alive                                              | 23 (32.4)      |
| Dead                                               | 48 (67.6)      |
| Genotyping method, n (%) (n = 148)                 |                |
| Whole-exome sequencing                             | 129 (87.2)     |
| Targeted capture sequencing                        | 19 (12.8)      |
| Median follow-up time (m), median (range) (n = 87) | 114 (15.3-232) |

**Supplementary Table 4: Representative CNAs in CML-BC (in-house)**

| Sample ID    | Region          | Type of CNA   |
|--------------|-----------------|---------------|
| CML_BC1      | <i>BCR_ABL1</i> | amplification |
| CML_BC16     | chr8            | amplification |
| CML_BC16     | <i>BCR_ABL1</i> | amplification |
| CML_BC16     | hyperploidy     | amplification |
| CML_BC17     | chr7/7p         | deletion      |
| CML_BC17     | chr9/9p         | deletion      |
| CML_BC17     | chr17p          | deletion      |
| CML_BC17     | hypoploidy      | deletion      |
| CML_BC18     | <i>BCR_ABL1</i> | amplification |
| CML_BC20     | <i>BCR_ABL1</i> | amplification |
| CML_BC20     | complex_CNAs    | complex_CNAs  |
| CML_BC21     | chr19           | amplification |
| CML_BC21     | <i>BCR_ABL1</i> | amplification |
| CML_BC22     | chr8            | amplification |
| CML_BC22     | chr17p          | deletion      |
| CML_BC22     | <i>BCR_ABL1</i> | amplification |
| CML_BC22     | complex_CNAs    | complex_CNAs  |
| CML_BC24     | chr8            | amplification |
| CML_BC24     | chr17p          | deletion      |
| CML_BC24     | chr19           | amplification |
| CML_BC24     | chr21           | amplification |
| CML_BC24     | <i>BCR_ABL1</i> | amplification |
| CML_BC24     | complex_CNAs    | complex_CNAs  |
| CML_BC25     | <i>BCR_ABL1</i> | amplification |
| CML_BC3      | chr9/9p         | deletion      |
| CML_BC3      | chr17p          | deletion      |
| CML_BC3      | <i>BCR_ABL1</i> | amplification |
| CML_BC3      | complex_CNAs    | complex_CNAs  |
| CML_BC3      | <i>CDKN2A/B</i> | deletion      |
| CML_BC4      | chr7/7p         | deletion      |
| CML_BC4      | <i>BCR_ABL1</i> | amplification |
| CML_BC8      | <i>BCR_ABL1</i> | amplification |
| CML_BC9      | chr21           | amplification |
| DU_CML_BC002 | chr6            | amplification |
| DU_CML_BC002 | chr8            | amplification |
| DU_CML_BC002 | chr19           | amplification |
| DU_CML_BC002 | chr21           | amplification |
| DU_CML_BC002 | <i>BCR_ABL1</i> | amplification |
| DU_CML_BC002 | hyperploidy     | amplification |
| DU_CML_BC004 | chr17p          | deletion      |
| DU_CML_BC004 | chr19           | amplification |
| DU_CML_BC004 | chr21           | amplification |
| DU_CML_BC004 | <i>BCR_ABL1</i> | amplification |
| DU_CML_BC004 | complex_CNAs    | complex_CNAs  |
| DU_CML_BC005 | <i>RUNX1</i>    | deletion      |
| DU_CML_BC008 | chr21           | amplification |
| DU_CML_BC009 | chr8            | amplification |
| DU_CML_BC029 | <i>RUNX1</i>    | deletion      |
| GIFU-143-1   | chr7/7p         | deletion      |
| GIFU-161-1   | <i>RUNX1</i>    | deletion      |
| GIFU-313-1   | <i>IKZF1</i>    | deletion      |
| HCM-017-1    | chr8            | amplification |
| KCGH_256_1   | chr7/7p         | deletion      |
| KCGH203-BC   | chr9/9p         | deletion      |

|                 |                 |               |
|-----------------|-----------------|---------------|
| KCGH203-BC      | complex_CNAs    | complex_CNAs  |
| KCGH-210-1      | <i>IKZF1</i>    | deletion      |
| KCGH-217-1      | chr7/7p         | deletion      |
| KCGH-350-1      | <i>IKZF1</i>    | deletion      |
| KCGH-762-1      | chr17q          | amplification |
| KCGH-762-1      | <i>RUNX1</i>    | deletion      |
| KCGH-762-1      | complex_CNAs    | complex_CNAs  |
| KCH-116-1       | <i>IKZF1</i>    | deletion      |
| TMU-006-7       | <i>IKZF1</i>    | deletion      |
| TMU-196-1       | chr6            | amplification |
| TMU-196-1       | <i>BCR_ABL1</i> | amplification |
| TMU-196-1       | <i>IKZF1</i>    | deletion      |
| TMU-298-1       | chr8            | amplification |
| TMU-298-1       | chr17p          | deletion      |
| TMU-960-1       | <i>BCR_ABL1</i> | amplification |
| TW-CML-L-002-BC | chr7/7p         | deletion      |
| TW-CML-L-003-BC | chr7/7p         | deletion      |
| TW-CML-L-003-BC | <i>RUNX1</i>    | deletion      |
| TW-CML-L-005-BC | <i>IKZF1</i>    | deletion      |
| TW-CML-L-007-BC | chr7/7p         | deletion      |
| TW-CML-L-007-BC | chr9/9p         | deletion      |
| TW-CML-L-007-BC | <i>BCR_ABL1</i> | amplification |
| TW-CML-L-007-BC | complex_CNAs    | complex_CNAs  |
| TW-CML-L-007-BC | <i>CDKN2A/B</i> | deletion      |
| TW-CML-L-007-BC | <i>IKZF1</i>    | deletion      |
| TW-CML-L-010-BC | chr8            | amplification |
| TW-CML-L-010-BC | chr9/9p         | deletion      |
| TW-CML-L-010-BC | complex_CNAs    | complex_CNAs  |
| TW-CML-L-010-BC | <i>CDKN2A/B</i> | deletion      |
| TW-CML-L-011-BC | chr7/7p         | deletion      |
| TW-CML-L-011-BC | chr9/9p         | deletion      |
| TW-CML-L-011-BC | chr17p          | deletion      |
| TW-CML-L-011-BC | <i>BCR_ABL1</i> | amplification |
| TW-CML-L-011-BC | complex_CNAs    | complex_CNAs  |
| TW-CML-L-011-BC | <i>CDKN2A/B</i> | deletion      |
| TW-CML-L-012-BC | chr7/7p         | deletion      |
| TW-CML-L-012-BC | chr9/9p         | deletion      |
| TW-CML-L-012-BC | chr17p          | deletion      |
| TW-CML-L-012-BC | <i>BCR_ABL1</i> | amplification |
| TW-CML-L-012-BC | <i>IKZF1</i>    | deletion      |
| TW-CML-L-012-BC | hypoploidy      | deletion      |
| TW-CML-L-013-BC | chr7/7p         | deletion      |
| TW-CML-L-013-BC | chr9/9p         | deletion      |
| TW-CML-L-013-BC | complex_CNAs    | complex_CNAs  |
| TW-CML-L-013-BC | <i>CDKN2A/B</i> | deletion      |
| TW-CML-L-014-BC | chr7/7p         | deletion      |
| TW-CML-L-014-BC | chr9/9p         | deletion      |
| TW-CML-L-014-BC | <i>BCR_ABL1</i> | amplification |
| TW-CML-L-014-BC | complex_CNAs    | complex_CNAs  |
| TW-CML-L-014-BC | <i>CDKN2A/B</i> | deletion      |
| TW-CML-L-015-BC | chr17p          | deletion      |
| TW-CML-L-015-BC | chr17q          | amplification |
| TW-CML-L-015-BC | complex_CNAs    | complex_CNAs  |
| TW-CML-L-015-BC | <i>IKZF1</i>    | deletion      |
| TW-CML-M-001-BC | chr8            | amplification |
| TW-CML-M-001-BC | <i>BCR_ABL1</i> | amplification |
| TW-CML-M-001-BC | complex_CNAs    | complex_CNAs  |

|                 |                 |               |
|-----------------|-----------------|---------------|
| TW-CML-M-006-BC | chr8            | amplification |
| TW-CML-M-006-BC | <i>BCR_ABL1</i> | amplification |
| TW-CML-M-006-BC | complex_CNAs    | complex_CNAs  |
| TW-CML-M-007-BC | chr21           | amplification |
| TW-CML-M-007-BC | <i>RUNX1</i>    | deletion      |
| TW-CML-M-018-BC | <i>BCR_ABL1</i> | amplification |
| TW-CML-M-018-BC | complex_CNAs    | complex_CNAs  |
| TW-CML-M-049-BC | chr17q          | amplification |
| TW-CML-M-049-BC | complex_CNAs    | complex_CNAs  |
| TW-CML-M-051-BC | chr21           | amplification |
| TW-CML-M-051-BC | complex_CNAs    | complex_CNAs  |
| TW-CML-M-051-BC | <i>RUNX1</i>    | deletion      |
| TW-CML-M-053-BC | chr17p          | deletion      |
| TW-CML-M-053-BC | chr19           | amplification |
| TW-CML-M-053-BC | <i>BCR_ABL1</i> | amplification |
| TW-CML-M-053-BC | complex_CNAs    | complex_CNAs  |
| TW-CML-M-058-BC | chr19           | amplification |
| TW-CML-M-058-BC | <i>BCR_ABL1</i> | amplification |
| TW-CML-M-058-BC | complex_CNAs    | complex_CNAs  |
| TW-CML-M-059-BC | chr19           | amplification |
| TW-CML-M-060-BC | chr6            | amplification |
| TW-CML-M-060-BC | chr8            | amplification |
| TW-CML-M-062-BC | chr6            | amplification |
| TW-CML-M-062-BC | chr8            | amplification |
| TW-CML-M-062-BC | chr17p          | deletion      |
| TW-CML-M-062-BC | chr19           | amplification |
| TW-CML-M-062-BC | chr21           | amplification |
| TW-CML-M-062-BC | <i>BCR_ABL1</i> | amplification |
| TW-CML-M-062-BC | hyperploidy     | amplification |
| TW-CML-M-063-BC | chr8            | amplification |
| TW-CML-M-063-BC | chr19           | amplification |
| TW-CML-M-063-BC | chr21           | amplification |
| TW-CML-M-063-BC | hyperploidy     | amplification |
| TW-CML-M-065-BC | chr7/7p         | deletion      |
| TW-CML-M-065-BC | complex_CNAs    | complex_CNAs  |
| TW-CML-M-066-BC | chr19           | amplification |
| TW-CML-M-066-BC | <i>BCR_ABL1</i> | amplification |
| TW-CML-M-066-BC | complex_CNAs    | complex_CNAs  |
| TW-CML-M-069-BC | chr6            | amplification |
| TW-CML-M-069-BC | chr8            | amplification |
| TW-CML-M-069-BC | chr17p          | deletion      |
| TW-CML-M-069-BC | chr19           | amplification |
| TW-CML-M-069-BC | chr21           | amplification |
| TW-CML-M-069-BC | <i>BCR_ABL1</i> | amplification |
| TW-CML-M-069-BC | hyperploidy     | amplification |
| TW-CML-M-070-BC | chr8            | amplification |
| TW-CML-M-070-BC | chr17q          | amplification |
| TW-CML-M-070-BC | complex_CNAs    | complex_CNAs  |
| TW-CML-M-074-BC | chr17p          | deletion      |
| TW-CML-M-074-BC | chr17q          | amplification |
| TW-CML-M-074-BC | complex_CNAs    | complex_CNAs  |
| TW-CML-M-075-BC | <i>RUNX1</i>    | deletion      |
| TW-CML-M-076-BC | chr17p          | deletion      |
| TW-CML-M-076-BC | complex_CNAs    | complex_CNAs  |
| TW-CML-M-078-BC | chr6            | amplification |
| TW-CML-M-078-BC | chr8            | amplification |
| TW-CML-M-078-BC | chr19           | amplification |

|                 |                 |               |
|-----------------|-----------------|---------------|
| TW-CML-M-078-BC | chr21           | amplification |
| TW-CML-M-078-BC | hyperploidy     | amplification |
| TW-CML-M-079-BC | chr8            | amplification |
| TW-CML-M-080-BC | <i>RUNX1</i>    | deletion      |
| TW-CML-M-081-BC | chr8            | amplification |
| TW-CML-M-081-BC | complex_CNAs    | complex_CNAs  |
| TW-CML-M-081-BC | <i>RUNX1</i>    | deletion      |
| TW-CML-M-082-BC | chr8            | amplification |
| TW-CML-M-082-BC | chr21           | amplification |
| TW-CML-M-082-BC | <i>BCR_ABL1</i> | amplification |
| TW-CML-M-082-BC | complex_CNAs    | complex_CNAs  |
| TW-CML-M-083-BC | <i>BCR_ABL1</i> | amplification |
| TW-CML-M-083-BC | complex_CNAs    | complex_CNAs  |
| TW-CML-M-086-BC | chr7/7p         | deletion      |
| TW-CML-M-086-BC | chr8            | amplification |
| TW-CML-M-086-BC | chr9/9p         | deletion      |
| TW-CML-M-086-BC | complex_CNAs    | complex_CNAs  |
| TW-CML-M-086-BC | <i>CDKN2A/B</i> | deletion      |
| AKT-001         | <i>BCR_ABL1</i> | amplification |
| AKT-003         | chr8            | amplification |
| AKT-003         | chr17p          | deletion      |
| AKT-003         | chr17q          | amplification |
| AKT-005         | chr17p          | deletion      |
| AKT-005         | chr17q          | amplification |
| AKT-006         | chr7/7p         | deletion      |
| AKT-006         | chr19           | amplification |
| AKT-006         | <i>BCR_ABL1</i> | amplification |
| AKT-006         | complex_CNAs    | complex_CNAs  |
| JUN-001         | <i>BCR_ABL1</i> | amplification |
| JUN-001         | <i>IKZF1</i>    | deletion      |
| JUN-002         | chr9/9p         | deletion      |
| JUN-002         | <i>IKZF1</i>    | deletion      |
| JUN-002         | <i>CDKN2A/B</i> | deletion      |
| JUN-002         | <i>RUNX1</i>    | deletion      |
| JUN-002         | complex_CNAs    | complex_CNAs  |
| JUN-003         | hypoploidy      | deletion      |
| JUN-003         | chr7/7p         | deletion      |
| JUN-003         | chr9/9p         | deletion      |
| JUN-003         | <i>BCR_ABL1</i> | amplification |
| JUN-003         | <i>CDKN2A/B</i> | deletion      |
| JUN-003         | complex_CNAs    | complex_CNAs  |

---

**Supplementary Table 5: Characteristics of patients with CML-BC analysed for survival**

|                                                             | Internal cohort          | External cohort          | <i>P</i> |
|-------------------------------------------------------------|--------------------------|--------------------------|----------|
| Number of cases (n=116)                                     | 99                       | 17                       |          |
| Age at BC diagnosis (y), median (range) (n = 116)           | 50 (16-86)               | 55 (19-84)               | 0.60     |
| Sex, n (%) (n = 116)                                        |                          |                          | 1        |
| Male                                                        | 59 (59.6)                | 10 (58.8)                |          |
| Female                                                      | 40 (40.4)                | 7 (41.2)                 |          |
| Lineage of blasts, n (%) (n = 116)                          |                          |                          | 0.79     |
| Myeloid                                                     | 64 (64.6)                | 12 (70.6)                |          |
| Lymphoid                                                    | 35 (35.4)                | 5 (29.4)                 |          |
| WBC ( $\times 10^3/\mu\text{L}$ ), median (range) (n = 116) | 50,100 (1,700-412,000)   | 11,000 (2,220-580,000)   | 0.094    |
| Hb (g/dL), median (range) (n = 116)                         | 9.3 (5.0-15.8)           | 11.8 (7.7-15.3)          | 0.014    |
| PLT ( $\times 10^3/\mu\text{L}$ ), median (range) (n = 116) | 96,000 (3,000-2,740,000) | 133,000 (10,000-496,000) | 0.24     |
| LDH (U/L), median (range) (n = 75)                          | 850 (75-6,332)           | 465 (189-3,671)          | 0.032    |
| Blast in BM (%), median (range) (n = 113)                   | 59 (1.0-98)              | 50 (17-96)               | 0.41     |
| Prior history of CP diagnosis, n (%) (n = 115)              |                          |                          | 1.00     |
| Yes                                                         | 76 (77.6)                | 14 (82.4)                |          |
| No                                                          | 22 (22.4)                | 3 (17.6)                 |          |
| Time from CP diagnosis (m), median (range) (n = 85)         | 34.3 (0.27-363)          | 35.2 (4.0-98.4)          | 0.64     |
| Age at CP diagnosis (y), median (range) (n = 85)            | 43 (14-85)               | 48 (14-82)               | 0.26     |
| Prior TKI therapy before BC, n (%) (n = 114)                |                          |                          | 0.11     |
| Yes                                                         | 36 (37.1)                | 10 (58.8)                |          |
| No                                                          | 61 (62.9)                | 7 (41.2)                 |          |
| TKIs used for CP, n (%) (n = 46)                            |                          |                          | 1        |
| Imatinib                                                    | 34 (94.4)                | 10 (100)                 |          |
| Dasatinib                                                   | 2 (5.6)                  | 0 (0)                    |          |
| TKI-based therapy for BC, n (%) (n = 116)                   |                          |                          | 0.43     |
| Yes                                                         | 59 (59.6)                | 12 (70.6)                |          |
| No                                                          | 40 (40.4)                | 5 (29.4)                 |          |
| TKIs used for BC, n (%) (n = 71)                            |                          |                          | 0.11     |
| Imatinib                                                    | 33 (55.9)                | 3 (25.0)                 |          |
| Dasatinib                                                   | 23 (39.0)                | 8 (66.7)                 |          |
| Nilotinib                                                   | 2 (3.4)                  | 0                        |          |
| Ponatinib                                                   | 1 (1.7)                  | 1 (8.3)                  |          |
| Final status, n (%) (n = 116)                               |                          |                          | 0.12     |
| Alive                                                       | 24 (24.2)                | 1 (5.9)                  |          |
| Dead                                                        | 75 (75.8)                | 16 (94.1)                |          |
| Method, n (%) (n = 116)                                     |                          |                          | <0.001   |
| Whole-exome sequencing                                      | 50 (50.5)                | 17 (100)                 |          |
| Targeted capture sequencing                                 | 49 (49.5)                | 0 (0)                    |          |
| Median follow-up time (y), median (range) (n = 116)         | 3.2 (0.48-30.4)          | 12.9 (12.9-12.9)         | 0.33     |

The two-sided Wilcoxon rank-sum test and Fisher's exact test were used for continuous and categorical data to calculate *P*-values, respectively.

**Supplementary Table 6: Representative CNAs in CML-CP (in-house)**

| Sample ID      | Region          | Type of CNA   |
|----------------|-----------------|---------------|
| TW_CML_M_001_D | chr8            | amplification |
| TW_CML_M_078_D | <i>BCR_ABL1</i> | amplification |
| TW_CML_M_080_D | <i>RUNX1</i>    | deletion      |

Supplementary Table 7: Primers used in this study

| Name                         | Sequence                            | Application                      |
|------------------------------|-------------------------------------|----------------------------------|
| RUNX1-ETS2-QF                | CTTCACAAACCCACCGCAAG                | measurement of <i>RUNX1-ETS2</i> |
| RUNX1-ETS2-QR                | AGGGAGTCTGAGCTCTCGAAG               | measurement of <i>RUNX1-ETS2</i> |
| 1_CML_chr1_11189760+300_F    | AAGCGGCCGCGCCTACCAGAGTTGCATCCT      | deep amplicon-sequencing         |
| 2_CML_chr1_38187211+287_F    | AAGCGGCCGCGAGCTCCCTCCCATAGCTGA      | deep amplicon-sequencing         |
| 3_CML_chr1_115258621+279_F   | AAGCGGCCGCCCCGACAAGTGAGAGACAGGA     | deep amplicon-sequencing         |
| 4_CML_chr2_209112973+260_F   | AAGCGGCCGCTCATACCTTGCTTAATGGGTGT    | deep amplicon-sequencing         |
| 5_CML_chr3_10089560+290_F    | AAGCGGCCGCTCCTACAGCTTCTTTCTCTCTCT   | deep amplicon-sequencing         |
| 6_CML_chr3_12632297+250_F    | AAGCGGCCGCTCCATTCCCTGAGCCGTCT       | deep amplicon-sequencing         |
| 7_CML_chr3_47036851+278_F    | AAGCGGCCGCTATTGACTCGGAACCAGGC       | deep amplicon-sequencing         |
| 8_CML_chr3_47043874+247_F    | AAGCGGCCGCTGTCCCAGTTCCGAAATGGACA    | deep amplicon-sequencing         |
| 9_CML_chr3_47165521+300_F    | AAGCGGCCGCGAGTGTGTGGCTTGGGCA        | deep amplicon-sequencing         |
| 10_CML_chr3_128200592+296_F  | AAGCGGCCGCTCTTGCTGGCAGCACAA         | deep amplicon-sequencing         |
| 11_CML_chr3_128204756+275_F  | AAGCGGCCGCGGGGACTGCCACTTTCCAT       | deep amplicon-sequencing         |
| 12_CML_chr4_106156656+250_F  | AAGCGGCCGCTGGTACAGCTGGAGAGCT        | deep amplicon-sequencing         |
| 13_CML_chr4_106157416+250_F  | AAGCGGCCGCGGATCATTCTTTGGCCAGACT     | deep amplicon-sequencing         |
| 14_CML_chr5_176939030+279_F  | AAGCGGCCGCTCTGACTTCCAGCACCCCT       | deep amplicon-sequencing         |
| 15_CML_chr6_56358814+250_F   | AAGCGGCCGCTTCATTGAGTTTGGTTTCCACC    | deep amplicon-sequencing         |
| 16_CML_chr6_79694871+465_F   | AAGCGGCCGCGCAGATCTAGTTGCAATCACCA    | deep amplicon-sequencing         |
| 17_CML_chr6_79728662+333_F   | AAGCGGCCGCTCTCAGTTACTTATTAGCTCTGGCA | deep amplicon-sequencing         |
| 18_CML_chr6_117680739+376_F  | AAGCGGCCGCCCCAGGCTCTAACACAGCA       | deep amplicon-sequencing         |
| 19_CML_chr7_50467801+349_F   | AAGCGGCCGCCCCGATGTACCAGCTGCACA      | deep amplicon-sequencing         |
| 20_CML_chr7_50468003+245_F   | AAGCGGCCGCGACTGACCAACCACATCGC       | deep amplicon-sequencing         |
| 21_CML_chr7_101918419+385_F  | AAGCGGCCGCTTGGCAGAAATCCCCCAGG       | deep amplicon-sequencing         |
| 22_CML_chr7_104681328+320_F  | AAGCGGCCGCTGGCATGCCCCAGTGT          | deep amplicon-sequencing         |
| 23_CML_chr7_151945032+478_F  | AAGCGGCCGCGAGCTGGTTTACCCATGCCA      | deep amplicon-sequencing         |
| 24_CML_chr8_128753053+250_F  | AAGCGGCCGCCCCCAAGGTAGTTATCCTTAAA    | deep amplicon-sequencing         |
| 25_CML_chr9_133738182+299_F  | AAGCGGCCGCCCCTGGCCGAGTTGGTTCAT      | deep amplicon-sequencing         |
| 26_CML_chr9_133747460+248_F  | AAGCGGCCGCACCCCTGAAAGCACTTCCCT      | deep amplicon-sequencing         |
| 27_CML_chr9_133748121+283_F  | AAGCGGCCGCTGTGGAAGTTGGGCCCA         | deep amplicon-sequencing         |
| 28_CML_chr9_133760457+250_F  | AAGCGGCCGCTCCTGGGCGCAAAGACAA        | deep amplicon-sequencing         |
| 29_CML_chr10_45485034+291_F  | AAGCGGCCGCGGGTGTAGTTACTGTCAGGGG     | deep amplicon-sequencing         |
| 30_CML_chr10_112343854+271_F | AAGCGGCCGCTGTTTCTGTGTGCAGTTGACA     | deep amplicon-sequencing         |
| 31_CML_chr10_124271411+247_F | AAGCGGCCGCGGTGAGAGCTGAGTTTTGCG      | deep amplicon-sequencing         |
| 32_CML_chr11_32414106+274_F  | AAGCGGCCGCGACACATGGCTGACTCTCTCA     | deep amplicon-sequencing         |
| 33_CML_chr11_32417788+249_F  | AAGCGGCCGCGAGCGGGCACACTTACCAGT      | deep amplicon-sequencing         |
| 34_CML_chr11_66031296+242_F  | AAGCGGCCGCGAGAAGCTTCCGTTCTCCCA      | deep amplicon-sequencing         |
| 35_CML_chr11_66033292+291_F  | AAGCGGCCGCGACTTACTGCTGATGCCCC       | deep amplicon-sequencing         |
| 36_CML_chr11_66033805+244_F  | AAGCGGCCGCGACCCACCAGTCTGTTCCCT      | deep amplicon-sequencing         |
| 37_CML_chr12_4409025+276_F   | AAGCGGCCGCGGATTGTCTCAAAGCTTGCCA     | deep amplicon-sequencing         |
| 38_CML_chr12_49441667+296_F  | AAGCGGCCGCTGGTATGGCCAGGACAAGG       | deep amplicon-sequencing         |
| 39_CML_chr12_69233300+248_F  | AAGCGGCCGCGACACAAGCTTACAAATCACAAAG  | deep amplicon-sequencing         |
| 40_CML_chr12_112888090+250_F | AAGCGGCCGCCCCCTTGCTCCCTTTCCAA       | deep amplicon-sequencing         |
| 41_CML_chr12_112926085+297_F | AAGCGGCCGCGCCCTATGCTTTTTGCCAACA     | deep amplicon-sequencing         |
| 42_CML_chr12_112926734+279_F | AAGCGGCCGCGAGCATTGTCTGTGATCCACT     | deep amplicon-sequencing         |
| 43_CML_chr12_122243732+240_F | AAGCGGCCGCCCCCTGCCAGATCGATGAGT      | deep amplicon-sequencing         |
| 44_CML_chr12_122255571+398_F | AAGCGGCCGCCCCAGCTCTCCTCCTCCTCAA     | deep amplicon-sequencing         |
| 45_CML_chr12_122263104+276_F | AAGCGGCCGCGACCCACCAGCCTCTCTTCA      | deep amplicon-sequencing         |
| 46_CML_chr14_45628321+134_F  | AAGCGGCCGCGACGTGATGAGACCCGAGTT      | deep amplicon-sequencing         |
| 47_CML_chr15_90631786+280_F  | AAGCGGCCGCGAGGTGAGTGGATCCCCTCTC     | deep amplicon-sequencing         |
| 48_CML_chr15_90631786+280_F  | AAGCGGCCGCGAGGTGAGTGGATCCCCTCTC     | deep amplicon-sequencing         |
| 49_CML_chr16_3781226+296_F   | AAGCGGCCGCGTGGTGTCTGCACTCGTTG       | deep amplicon-sequencing         |
| 50_CML_chr16_3817599+296_F   | AAGCGGCCGCGCGCAAGAAAGGTAAGGGCA      | deep amplicon-sequencing         |
| 51_CML_chr16_15818442+293_F  | AAGCGGCCGCGGGATCTCAGCGCAGAGAA       | deep amplicon-sequencing         |
| 52_CML_chr16_24573255+244_F  | AAGCGGCCGCGACAACCTCTGATGAGATCTCCG   | deep amplicon-sequencing         |
| 53_CML_chr16_67670562+265_F  | AAGCGGCCGCGCACCACTGTGCTTCTCTGA      | deep amplicon-sequencing         |
| 54_CML_chr17_7577411+272_F   | AAGCGGCCGCAATCGGTAAGAGGTGGGCC       | deep amplicon-sequencing         |
| 55_CML_chr17_7578082+297_F   | AAGCGGCCGCAAGCAGCAGGAGAAAGCCC       | deep amplicon-sequencing         |
| 56_CML_chr17_37566570+296_F  | AAGCGGCCGCGATCGAAGAGACAGGTGGCG      | deep amplicon-sequencing         |
| 57_CML_chr18_29099587+382_F  | AAGCGGCCGCGAGCCCTATGCAGTTTGCT       | deep amplicon-sequencing         |
| 58_CML_chr20_31021575+241_F  | AAGCGGCCGCAATCCTTTGAGCAGCGCG        | deep amplicon-sequencing         |
| 59_CML_chr20_31022179+482_F  | AAGCGGCCGCTCCCTAGGTCAGATCACCCA      | deep amplicon-sequencing         |
| 60_CML_chr20_31022674+250_F  | AAGCGGCCGCGACCTGCCTTCTCTGAGAAAGG    | deep amplicon-sequencing         |
| 61_CML_chr20_49195660+243_F  | AAGCGGCCGCTGAGAATTGGACCTGGCTGAC     | deep amplicon-sequencing         |
| 62_CML_chr20_57415469+290_F  | AAGCGGCCGCGACGAGGAAGAGTTGACTACG     | deep amplicon-sequencing         |
| 63_CML_chr21_30927357+300_F  | AAGCGGCCGCGAAAGAGATGACTCACCTGTTCA   | deep amplicon-sequencing         |
| 64_CML_chr21_36164269+400_F  | AAGCGGCCGCGCCTGACCTACAGCGAGATC      | deep amplicon-sequencing         |
| 65_CML_chr21_36231667+250_F  | AAGCGGCCGCGGAAAGGTTGAACCAAGGA       | deep amplicon-sequencing         |



|                              |                                      |                          |
|------------------------------|--------------------------------------|--------------------------|
| 66_CML_chr21_36252741+244_F  | AAGCGGCCGCTGTTAAGACAGACCGAGTTTCT     | deep amplicon-sequencing |
| 67_CML_chr21_36252801+283_F  | AAGCGGCCGCTGGGTTTGTGCCATGAAACG       | deep amplicon-sequencing |
| 68_CML_chr21_36258989+363_F  | AAGCGGCCGCTCCCCACATCCCAAGCTA         | deep amplicon-sequencing |
| 69_CML_chrX_39922923+250_F   | AAGCGGCCGCGCCCTTTTCTGCCAGTT          | deep amplicon-sequencing |
| 70_CML_chrX_39923662+248_F   | AAGCGGCCGCGCTGCTGTACCTGAGACT         | deep amplicon-sequencing |
| 71_CML_chrX_39931966+276_F   | AAGCGGCCGCGAGGTGAAGACTGGCTGT         | deep amplicon-sequencing |
| 72_CML_chrX_39933746+289_F   | AAGCGGCCGCTGTCTGCGCAATGGACGA         | deep amplicon-sequencing |
| 73_CML_chrX_41025250+273_F   | AAGCGGCCGCTGATGGGGGATGAACCAGAC       | deep amplicon-sequencing |
| 74_CML_chrX_44942614+316_F   | AAGCGGCCGCTGTATTGGAACACAAGGGTT       | deep amplicon-sequencing |
| 75_CML_chrX_53441831+272_F   | AAGCGGCCGCTGCATGAGTTGGCAAGGGT        | deep amplicon-sequencing |
| 76_CML_chrX_118708577+295_F  | AAGCGGCCGCCCCTCCCCTTCTCTGCTTCT       | deep amplicon-sequencing |
| 77_CML_chrX_118708697+370_F  | AAGCGGCCGCGCCTCATGCGGGACTTCAA        | deep amplicon-sequencing |
| 78_CML_chrX_118716950+298_F  | AAGCGGCCGCGAGCAGATTCACATAACTCTGGGT   | deep amplicon-sequencing |
| 79_CML_chrX_129148413+300_F  | AAGCGGCCGCTGCTTCTGCCAAGGTGCT         | deep amplicon-sequencing |
| 80_CML_chrX_129149659+240_F  | AAGCGGCCGCGCTTGTGGCCTGAAGCT          | deep amplicon-sequencing |
| 81_CML_chrX_133548839+566_F  | AAGCGGCCGCGCGACCTCATTTTTATTTCAATGTCC | deep amplicon-sequencing |
| 1_CML_chr1_11189760+300_R    | AAGCGGCCGCTGCTTTGCTATGTGCCAGGT       | deep amplicon-sequencing |
| 2_CML_chr1_38187211+287_R    | AAGCGGCCGCTGTGGCTGCTTGCAGCT          | deep amplicon-sequencing |
| 3_CML_chr1_115258621+279_R   | AAGCGGCCGCTGGAAGGTCACACTAGGGT        | deep amplicon-sequencing |
| 4_CML_chr2_209112973+260_R   | AAGCGGCCGCGGAAATCACCAAATGGACCA       | deep amplicon-sequencing |
| 5_CML_chr3_10089560+290_R    | AAGCGGCCGCGAGACCCAGGTCAGAGTTCT       | deep amplicon-sequencing |
| 6_CML_chr3_12632297+250_R    | AAGCGGCCGCTCCACGGGAAAGCACAGT         | deep amplicon-sequencing |
| 7_CML_chr3_47036851+278_R    | AAGCGGCCGCCCCACTGTACAGCTGCTT         | deep amplicon-sequencing |
| 8_CML_chr3_47043874+247_R    | AAGCGGCCGCTAGTTCAGTCCCCTGGCT         | deep amplicon-sequencing |
| 9_CML_chr3_47165521+300_R    | AAGCGGCCGCCCCCTCCAGCTGTACCTCTTC      | deep amplicon-sequencing |
| 10_CML_chr3_128200592+296_R  | AAGCGGCCGCTTGACTGAGCTGGTGGGGA        | deep amplicon-sequencing |
| 11_CML_chr3_128204756+275_R  | AAGCGGCCGCACTCTCTGTGTACCCAGGGG       | deep amplicon-sequencing |
| 12_CML_chr4_106156656+250_R  | AAGCGGCCGCGGAGGTCATTTGATTGGAGAGA     | deep amplicon-sequencing |
| 13_CML_chr4_106157416+250_R  | AAGCGGCCGCTGCAAAAAGTTTCAGGATGTGT     | deep amplicon-sequencing |
| 14_CML_chr5_176939030+279_R  | AAGCGGCCGCGAGCGCCACCTTAGCTGTT        | deep amplicon-sequencing |
| 15_CML_chr6_56358814+250_R   | AAGCGGCCGCGAGCTTGGGACTGATGACCT       | deep amplicon-sequencing |
| 16_CML_chr6_79694871+465_R   | AAGCGGCCGCTGCTGCCACTTGACCTCT         | deep amplicon-sequencing |
| 17_CML_chr6_79728662+333_R   | AAGCGGCCGCGAGGGAGCCATCTGTTGCT        | deep amplicon-sequencing |
| 18_CML_chr6_117680739+376_R  | AAGCGGCCGCTGGATCAAAATCAAGTTGTGTGGAC  | deep amplicon-sequencing |
| 19_CML_chr7_50467801+349_R   | AAGCGGCCGCGACACCTTCATCTGCTCCCC       | deep amplicon-sequencing |
| 20_CML_chr7_50468003+245_R   | AAGCGGCCGCCATGTTGCACTCAAAAGGATCAC    | deep amplicon-sequencing |
| 21_CML_chr7_101918419+385_R  | AAGCGGCCGCTCAAAGCCCAGTGTGGCA         | deep amplicon-sequencing |
| 22_CML_chr7_104681328+320_R  | AAGCGGCCGCGAGCAATCAGTTCTCAGTGTT      | deep amplicon-sequencing |
| 23_CML_chr7_151945032+478_R  | AAGCGGCCGCGAGGAACCTGAAACAGTGGT       | deep amplicon-sequencing |
| 24_CML_chr8_128753053+250_R  | AAGCGGCCGCAAGTTGTGAGGTTGCATTTG       | deep amplicon-sequencing |
| 25_CML_chr9_133738182+299_R  | AAGCGGCCGCAATGCCAGCAGACGCCTT         | deep amplicon-sequencing |
| 26_CML_chr9_133747460+248_R  | AAGCGGCCGCTCCAACGAGGTTTTGTGCAG       | deep amplicon-sequencing |
| 27_CML_chr9_133748121+283_R  | AAGCGGCCGCTCCAGGTACTCCATGGCTGA       | deep amplicon-sequencing |
| 28_CML_chr9_133760457+250_R  | AAGCGGCCGCACTCGGTTGATATGAGAGGGA      | deep amplicon-sequencing |
| 29_CML_chr10_45485034+291_R  | AAGCGGCCGCTTCATGCTGGGAGGCACAG        | deep amplicon-sequencing |
| 30_CML_chr10_112343854+271_R | AAGCGGCCGCTGCTTCAAGTGTCTTCCAAATCC    | deep amplicon-sequencing |
| 31_CML_chr10_124271411+247_R | AAGCGGCCGCAACAGCGCTCCCTTCTCCT        | deep amplicon-sequencing |
| 32_CML_chr11_32414106+274_R  | AAGCGGCCGCTCCTAGTAGGAGGTTGCCT        | deep amplicon-sequencing |
| 33_CML_chr11_32417788+249_R  | AAGCGGCCGCTCCAGTGCTCACTCTCCCT        | deep amplicon-sequencing |
| 34_CML_chr11_66031296+242_R  | AAGCGGCCGCTGGGTGAAACTTGCCCAGG        | deep amplicon-sequencing |
| 35_CML_chr11_66033292+291_R  | AAGCGGCCGCTCAAGGAGCCACTGCCATC        | deep amplicon-sequencing |
| 36_CML_chr11_66033805+244_R  | AAGCGGCCGCTGAAGAGGCATGCTGGAGG        | deep amplicon-sequencing |
| 37_CML_chr12_4409025+276_R   | AAGCGGCCGCTGATCTAGGTGGGGGCAGA        | deep amplicon-sequencing |
| 38_CML_chr12_49441667+296_R  | AAGCGGCCGCTGGGGTTCCTGACTCTGGT        | deep amplicon-sequencing |
| 39_CML_chr12_69233300+248_R  | AAGCGGCCGCGCACATGTAAGCAGGCCA         | deep amplicon-sequencing |
| 40_CML_chr12_112888090+250_R | AAGCGGCCGCGTGGTCACTAAAATGTTACTGACCT  | deep amplicon-sequencing |
| 41_CML_chr12_112926085+297_R | AAGCGGCCGCTCGTGAGCACTTTCCTTCCA       | deep amplicon-sequencing |
| 42_CML_chr12_112926734+279_R | AAGCGGCCGCTGAGAATCCGCATGCCAG         | deep amplicon-sequencing |
| 43_CML_chr12_122243732+240_R | AAGCGGCCGCGAAGTGCTGTGCAAGTGC         | deep amplicon-sequencing |
| 44_CML_chr12_122255571+398_R | AAGCGGCCGCGAGATGGAACCGTACGCCAC       | deep amplicon-sequencing |
| 45_CML_chr12_122263104+276_R | AAGCGGCCGCTCTGGCCTCACAACTCCTC        | deep amplicon-sequencing |
| 46_CML_chr14_45628321+134_R  | AAGCGGCCGCTCGTGTCTTTCCCTGAGGC        | deep amplicon-sequencing |
| 47_CML_chr15_90631786+280_R  | AAGCGGCCGCGCTGCTGCTGTGTTGTTGC        | deep amplicon-sequencing |
| 48_CML_chr15_90631786+280_R  | AAGCGGCCGCGCTGCTGCTGTGTTGTTGC        | deep amplicon-sequencing |
| 49_CML_chr16_3781226+296_R   | AAGCGGCCGCGAGGTGCCATGTCCCTTGTG       | deep amplicon-sequencing |
| 50_CML_chr16_3817599+296_R   | AAGCGGCCGCTGCAAGGAGCTTCCCAAGT        | deep amplicon-sequencing |
| 51_CML_chr16_15818442+293_R  | AAGCGGCCGCTGCCACATCATCCAGGGGA        | deep amplicon-sequencing |
| 52_CML_chr16_24573255+244_R  | AAGCGGCCGCAACACACAGGCTTACCGAA        | deep amplicon-sequencing |
| 53_CML_chr16_67670562+265_R  | AAGCGGCCGCAACAGGACCCATCTGGCTC        | deep amplicon-sequencing |
| 54_CML_chr17_7577411+272_R   | AAGCGGCCGCAAAAGCCCTCCCCTGCTTG        | deep amplicon-sequencing |

|                             |                                       |                          |
|-----------------------------|---------------------------------------|--------------------------|
| 55_CML_chr17_7578082+297_R  | AAGCGGCCGCTAGCGATGGTGAGCAGCTG         | deep amplicon-sequencing |
| 56_CML_chr17_37566570+296_R | AAGCGGCCGCACAAAAGAACCTGCCCCCGG        | deep amplicon-sequencing |
| 57_CML_chr18_29099587+382_R | AAGCGGCCGCACATAAAAGTCTCTCACACCACA     | deep amplicon-sequencing |
| 58_CML_chr20_31021575+241_R | AAGCGGCCGCTTAACCTTCAGGGCCCCAGA        | deep amplicon-sequencing |
| 59_CML_chr20_31022179+482_R | AAGCGGCCGCTCTGGACATGGCAGTTCCG         | deep amplicon-sequencing |
| 60_CML_chr20_31022674+250_R | AAGCGGCCGCTGCTCCTCATCATCACTTTCCC      | deep amplicon-sequencing |
| 61_CML_chr20_49195660+243_R | AAGCGGCCGCTGGTCACACCTGGATTCAAACA      | deep amplicon-sequencing |
| 62_CML_chr20_57415469+290_R | AAGCGGCCGCTTTGTCCTCGGGCTTGAGC         | deep amplicon-sequencing |
| 63_CML_chr21_30927357+300_R | AAGCGGCCGCTGGTGACCAATATCCAGATGG       | deep amplicon-sequencing |
| 64_CML_chr21_36164269+400_R | AAGCGGCCGCTACCACTGTACTACGGCG          | deep amplicon-sequencing |
| 65_CML_chr21_36231667+250_R | AAGCGGCCGCACCAACCTCATTCTGTTTTGTTCTC   | deep amplicon-sequencing |
| 66_CML_chr21_36252741+244_R | AAGCGGCCGCTGGCACTCTGGTCACTGT          | deep amplicon-sequencing |
| 67_CML_chr21_36252801+283_R | AAGCGGCCGCCACTACACAAATGCCCTAAAAGTGT   | deep amplicon-sequencing |
| 68_CML_chr21_36258989+363_R | AAGCGGCCGCTGAGCCCAGGCAAGATGAG         | deep amplicon-sequencing |
| 69_CML_chrX_39922923+250_R  | AAGCGGCCGCCCTCTAACCCTTAGAAGACCCAC     | deep amplicon-sequencing |
| 70_CML_chrX_39923662+248_R  | AAGCGGCCGCGCCTTCTCATGGCGACCTT         | deep amplicon-sequencing |
| 71_CML_chrX_39931966+276_R  | AAGCGGCCGCGCCGAACCCCACTGGAAT          | deep amplicon-sequencing |
| 72_CML_chrX_39933746+289_R  | AAGCGGCCGCTGCCCTGGGTCAATCCTT          | deep amplicon-sequencing |
| 73_CML_chrX_41025250+273_R  | AAGCGGCCGCGGTACATGAAAAAGTACATCAGACACC | deep amplicon-sequencing |
| 74_CML_chrX_44942614+316_R  | AAGCGGCCGCTCTGGCTGTCTTTGCATGT         | deep amplicon-sequencing |
| 75_CML_chrX_53441831+272_R  | AAGCGGCCGCGGATGCCATCAGCTTTGTGC        | deep amplicon-sequencing |
| 76_CML_chrX_118708577+295_R | AAGCGGCCGCCCTGCAACCTTCGGGAAGA         | deep amplicon-sequencing |
| 77_CML_chrX_118708697+370_R | AAGCGGCCGCCCCAGCCAGACCCAAACAT         | deep amplicon-sequencing |
| 78_CML_chrX_118716950+298_R | AAGCGGCCGCTGGCCAGCTTCTTTAAACTGT       | deep amplicon-sequencing |
| 79_CML_chrX_129148413+300_R | AAGCGGCCGCTTGCTGCTGGTGTGCAC           | deep amplicon-sequencing |
| 80_CML_chrX_129149659+240_R | AAGCGGCCGCTTTCACTCGCCCCAGATCC         | deep amplicon-sequencing |
| 81_CML_chrX_133548839+566_R | AAGCGGCCGCACGGCTTGCAAATGCCTTG         | deep amplicon-sequencing |

---

**Supplementary Table 8: Public datasets used in this study**

| Datasets                                       | Accession ID    |
|------------------------------------------------|-----------------|
| Kim, T. et al. Leuk Res 59, 142-148 (2017).    | PRJEB20846      |
| Branford, S. et al. Blood 132, 948-961 (2018). | EGAS00001003071 |
