# Supplementary material for: Clonal evolution and clinical implications of genetic abnormalities in blastic transformation of chronic myeloid leukaemia
Source: PubMed Central journal article supplement (PMC8121838; doi:10.1038/s41467-021-23097-w), 2021-05-14
Supplement: 41467_2021_23097_MOESM2_ESM.pdf [file 41467_2021_23097_MOESM2_ESM.pdf]

## **Description of Additional Supplementary Files**

File Name: Supplementary Data 1

Description: Summary of mutations in CML-BC (in-house)

File Name: Supplementary Data 2

Description: Summary of mutations in CML-CP (in-house)
